# Supplementary material
Source: PubMed Central journal article supplement (PMC4742363)
Supplement: NIHMS731138-supplement-supplemental_data.pdf [file NIHMS731138-supplement-supplemental_data.pdf]

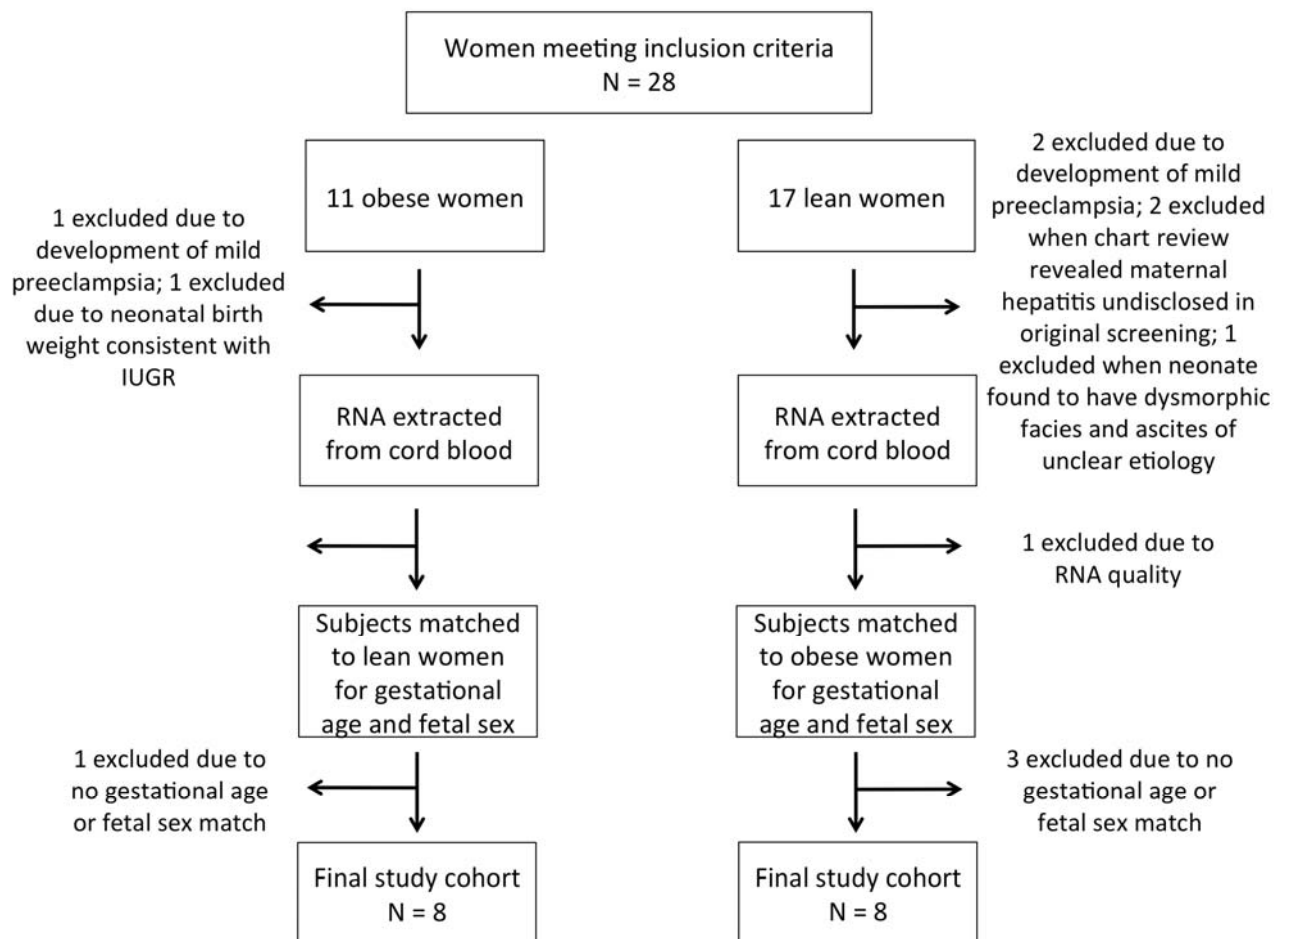

**Figure S1.** Flow of Subjects Through the Study

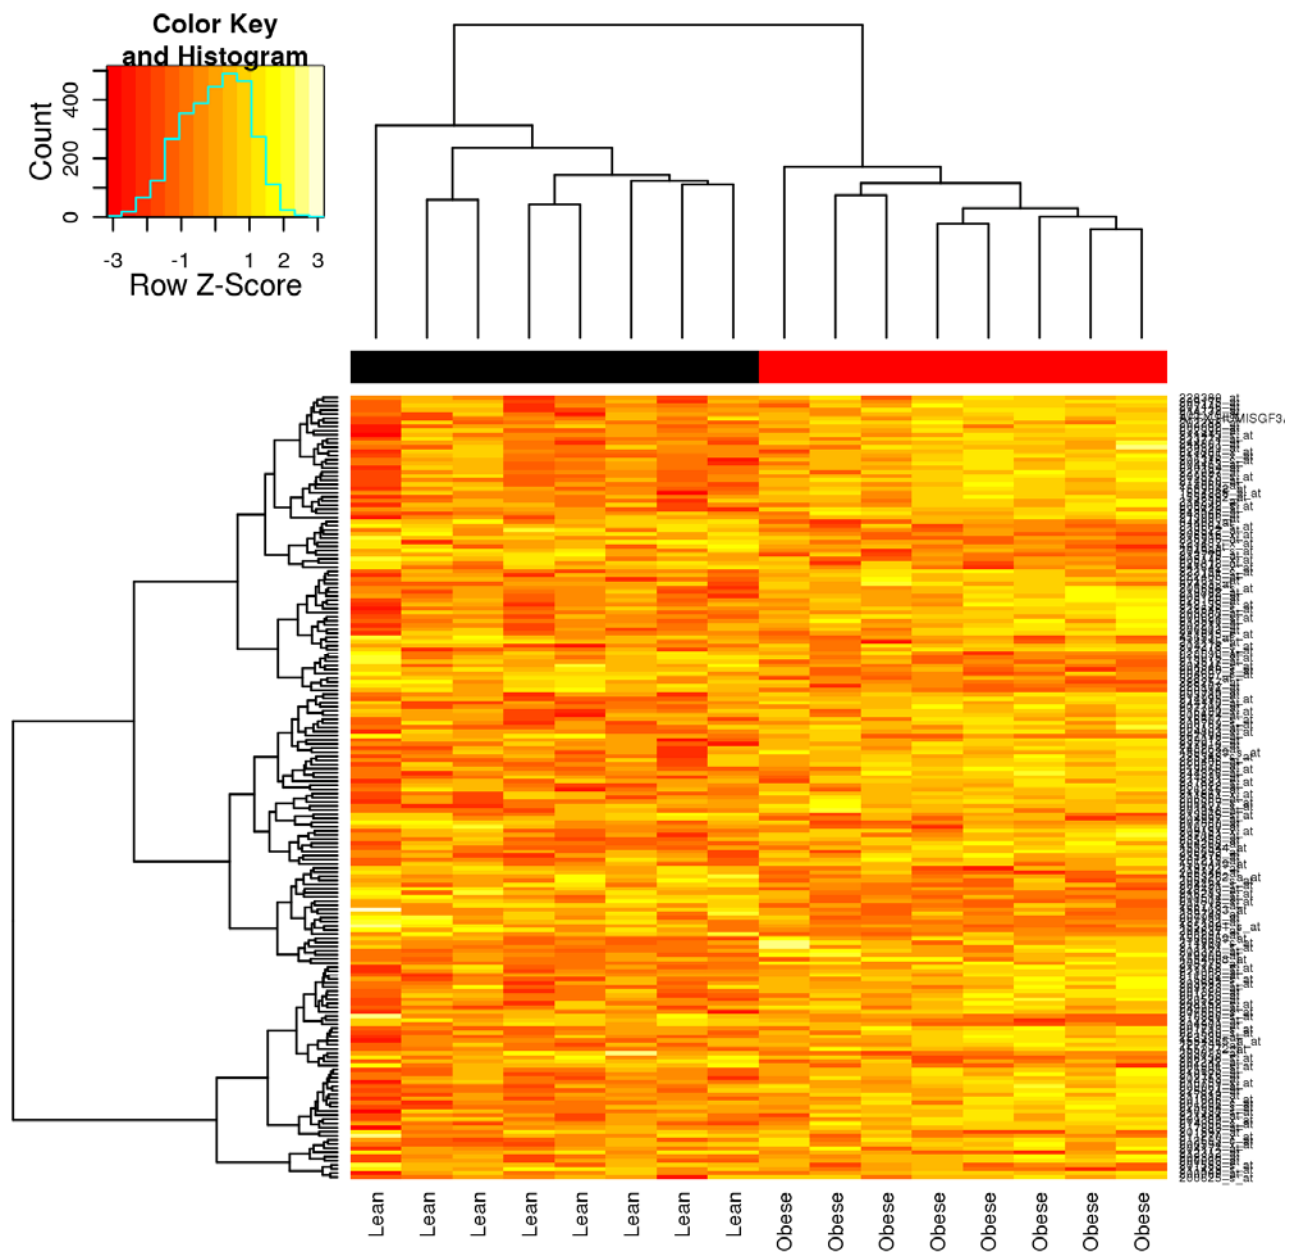

This heatmap representation of expression of the 190 genes downstream from significantly activated or inhibited upstream regulators confirms that expression clusters by maternal body mass index (BMI).

**Figure S2.** Heatmap of Genes Affected by Significant Upstream Regulators

**Table S1.** Glucose tolerance test results by subject\*

| Obese Subject | BMI (kg/m <sup>2</sup> ) | 1-hour GLT (mg/dL)                              | 3-hour GTT (mg/dL) | Lean Subject | BMI (kg/m <sup>2</sup> ) | 1-hour GLT (mg/dL) | 3-hour GTT (mg/dL) |
|---------------|--------------------------|-------------------------------------------------|--------------------|--------------|--------------------------|--------------------|--------------------|
| 1             | 36.4                     | 124                                             | N/A                | 1            | 20.2                     | 144                | 68-125-123-110     |
| 2             | 35.5                     | 156                                             | 89-129-133-85      | 2            | 19.8                     | 173                | 76-158-132-118     |
| 3             | 53.4                     | 71                                              | N/A                | 3            | 23.08                    | 65                 |                    |
| 4             | 38.0                     | 124                                             | N/A                | 4            | 17.75                    | 133                |                    |
| 5             | 39.9                     | 111, 99                                         | N/A                | 5            | 21.2                     | 94                 |                    |
| 6             | 57.8                     | 87 (early)<br>100 (3 <sup>rd</sup> trimester)   | N/A                | 6            | 24.4                     | 84                 |                    |
| 7             | 32.6                     | 107                                             | N/A                | 7            | 17.6                     | 134                |                    |
| 8             | 34.1                     | 117 (early),<br>124 (3 <sup>rd</sup> trimester) | N/A                | 8            | 18.6                     | 102                |                    |

BMI: body mass index

GLT: glucose loading test

GTT: glucose tolerance test

N/A: not applicable

\*Per standard obstetrical care in the United States, all patients underwent glucose tolerance testing with a 50-gram glucose drink and measurement of serum glucose one hour later (glucose loading test or GLT). If serum glucose level was  $\geq 140$  mg/dL on this screening test, patients then completed a fasting 3-hour oral glucose tolerance test with a 100-gram glucose challenge (GTT, Carpenter/Coustan diagnostic criteria used). The screening GLT was performed at 26-28 weeks, as per usual obstetrical care. Some obese subjects have two GLT values listed, because these individuals underwent an early glucose tolerance testing in addition to the 26-28 week test. This reflects some practitioners' preference for early glucose testing in the obese patient population to identify pre-pregnancy glucose intolerance or diabetes.

**Table S2.** Significantly differentially regulated genes in fetuses of obese women at term

| Gene Name                                                                     | Symbol                     | Affymetrix Probe ID | Fold Change | BH- p value |
|-------------------------------------------------------------------------------|----------------------------|---------------------|-------------|-------------|
| <i>aminoadipate-semialdehyde synthase</i>                                     | AASS                       | 210852_s_at         | -1.76       | 0.00        |
| <i>ATP-binding cassette, sub-family A (ABC1), member 5</i>                    | ABCA5                      | 241705_at           | 1.85        | 0.02        |
| <i>ABRA C-terminal like</i>                                                   | ABRACL                     | 223361_at           | 1.43        | 0.01        |
| <i>ankyrin repeat and BTB (POZ) domain containing 1</i>                       | ABTB1                      | 242567_at           | 2.81        | 0.00        |
| <i>acetyl-CoA acetyltransferase 1</i>                                         | ACAT1                      | 1559239_s_at        | 2.49        | 0.03        |
| <i>acyl-CoA binding domain containing 3</i>                                   | ACBD3                      | 202323_s_at         | -1.92       | 0.02        |
| <i>adenosine A1 receptor</i>                                                  | ADORA1                     | 216220_s_at         | 1.63        | 0.04        |
| <i>androgen-dependent TFPI-regulating protein</i>                             | ADTRP                      | 229070_at           | 1.47        | 0.03        |
| <i>ArfGAP with GTPase domain, ankyrin repeat and PH domain 6</i>              | AGAP6<br>(includes others) | 221850_x_at         | 1.45        | 0.00        |
| <i>ArfGAP with FG repeats 1</i>                                               | AGFG1                      | 226561_at           | 2.00        | 0.04        |
| <i>agmatine ureohydrolase (agmatinase)</i>                                    | AGMAT                      | 219792_at           | -2.07       | 0.00        |
| <i>1-acylglycerol-3-phosphate O-acyltransferase 1</i>                         | AGPAT1                     | 32836_at            | -1.40       | 0.04        |
| <i>1-acylglycerol-3-phosphate O-acyltransferase 2</i>                         | AGPAT2                     | 32837_at            | -1.37       | 0.00        |
| <i>A kinase (PRKA) anchor protein 1</i>                                       | AKAP1                      | 201675_at           | 1.52        | 0.01        |
| <i>A kinase (PRKA) anchor protein 17A</i>                                     | AKAP17A                    | 203624_at           | 1.38        | 0.04        |
| <i>A kinase (PRKA) anchor protein 9</i>                                       | AKAP9                      | 210962_s_at         | 1.36        | 0.01        |
| <i>aldo-keto reductase family 7, member A2 (aflatoxin aldehyde reductase)</i> | AKR7A2                     | 214259_s_at         | -1.40       | 0.04        |
| <i>AKT interacting protein</i>                                                | AKTIP                      | 223894_s_at         | 1.80        | 0.04        |
| <i>aldolase B, fructose-bisphosphate</i>                                      | ALDOB                      | 243901_at           | -2.14       | 0.00        |
| <i>arachidonate 5-lipoxygenase-activating protein</i>                         | ALOX5AP                    | 204174_at           | 1.54        | 0.05        |
| <i>alpha-kinase 3</i>                                                         | ALPK3                      | 228342_s_at         | 1.94        | 0.00        |
| <i>amyotrophic lateral sclerosis 2 (juvenile)</i>                             | ALS2                       | 1555284_at          | -2.18       | 0.00        |
| <i>adenosine monophosphate deaminase 2</i>                                    | AMPD2                      | 212360_at           | -1.60       | 0.00        |
| <i>amylase, alpha 2A (pancreatic)</i>                                         | AMY2A                      | 208498_s_at         | 1.94        | 0.00        |
| <i>anaphase promoting complex subunit 4</i>                                   | ANAPC4                     | 232524_x_at         | 1.77        | 0.00        |
| <i>angel homolog 2 (Drosophila)</i>                                           | ANGEL2                     | 217630_at           | 2.36        | 0.00        |
| <i>angel homolog 2 (Drosophila)</i>                                           | ANGEL2                     | 221825_at           | 1.54        | 0.00        |
| <i>ankyrin repeat and FYVE domain containing 1</i>                            | ANKFY1                     | 219868_s_at         | 3.12        | 0.00        |
| <i>ankyrin repeat domain 13 family, member D</i>                              | ANKRD13D                   | 238642_at           | -2.03       | 0.00        |
| <i>ankyrin repeat domain 40</i>                                               | ANKRD40                    | 241032_at           | -4.06       | 0.00        |
| <i>ankyrin repeat domain 52</i>                                               | ANKRD52                    | 228257_at           | -1.43       | 0.01        |
| <i>ankyrin repeat domain 65</i>                                               | ANKRD65                    | 1556181_at          | -1.98       | 0.02        |
| <i>adaptor-related protein complex 1 associated regulatory protein</i>        | AP1AR                      | 242753_x_at         | 2.41        | 0.00        |
| <i>adaptor-related protein complex 1,</i>                                     | AP1G1                      | 203350_at           | 1.28        | 0.04        |

|                                                                                                 |           |              |       |      |
|-------------------------------------------------------------------------------------------------|-----------|--------------|-------|------|
| <i>gamma 1 subunit</i>                                                                          |           |              |       |      |
| <i>adaptor-related protein complex 2, alpha 1 subunit</i>                                       | AP2A1     | 223237_x_at  | -1.56 | 0.00 |
| <i>adaptor-related protein complex 4, epsilon 1 subunit</i>                                     | AP4E1     | 228164_at    | 1.58  | 0.04 |
| <i>adaptor-related protein complex 5, mu 1 subunit</i>                                          | AP5M1     | 1555448_at   | -1.28 | 0.03 |
| <i>adaptor-related protein complex 5, zeta 1 subunit</i>                                        | AP5Z1     | 209912_s_at  | -1.24 | 0.04 |
| <i>amyloid beta (A4) precursor protein-binding, family A, member 3</i>                          | APBA3     | 205146_x_at  | -1.68 | 0.01 |
| <i>apoptosis inhibitor 5</i>                                                                    | API5      | 214960_at    | 2.32  | 0.00 |
| <i>adipocyte plasma membrane associated protein</i>                                             | APMAP     | 227857_at    | 1.41  | 0.00 |
| <i>ADP-ribosylation factor GTPase activating protein 3</i>                                      | ARFGAP3   | 202211_at    | 1.64  | 0.00 |
| <i>Rho GTPase activating protein 18</i>                                                         | ARHGAP18  | 225173_at    | -1.54 | 0.02 |
| <i>Rho GTPase activating protein 21</i>                                                         | ARHGAP21  | 241701_at    | -1.84 | 0.01 |
| <i>Rho GTPase activating protein 28</i>                                                         | ARHGAP28  | 220381_at    | -2.62 | 0.00 |
| <i>artemin</i>                                                                                  | ARTN      | 210237_at    | -2.64 | 0.01 |
| <i>ankyrin repeat and SOCS box containing 14</i>                                                | ASB14     | 237785_at    | -2.59 | 0.00 |
| <i>ASMTL antisense RNA 1</i>                                                                    | ASMTL-AS1 | 244875_at    | -1.57 | 0.00 |
| <i>ATPase, Na<sup>+</sup>/K<sup>+</sup> transporting, beta 3 polypeptide</i>                    | ATP1B3    | 226570_at    | 1.58  | 0.03 |
| <i>ATPase, Ca<sup>++</sup> transporting, plasma membrane 4</i>                                  | ATP2B4    | 212135_s_at  | 1.57  | 0.01 |
| <i>ATP synthase, H<sup>+</sup> transporting, mitochondrial F1 complex, gamma polypeptide 1</i>  | ATP5C1    | 214132_at    | 2.13  | 0.01 |
| <i>ATP synthase, H<sup>+</sup> transporting, mitochondrial Fo complex, subunit s (factor B)</i> | ATP5S     | 238799_at    | 1.43  | 0.01 |
| <i>ATPase, H<sup>+</sup> transporting, lysosomal 56/58kDa, V1 subunit B1</i>                    | ATP6V1B1  | 1554847_at   | 2.83  | 0.02 |
| <i>ATPase inhibitory factor 1</i>                                                               | ATPIF1    | 223339_at    | 1.37  | 0.00 |
| <i>axin 2</i>                                                                                   | AXIN2     | 224176_s_at  | -1.36 | 0.02 |
| <i>beta-1,4-N-acetyl-galactosaminyl transferase 4</i>                                           | B4GALNT4  | 238060_s_at  | -1.46 | 0.01 |
| <i>UDP-Gal:betaGlcNAc beta 1,4-galactosyltransferase, polypeptide 5</i>                         | B4GALT5   | 221484_at    | 1.83  | 0.05 |
| <i>Bardet-Biedl syndrome 1</i>                                                                  | BBS1      | 218471_s_at  | 1.54  | 0.04 |
| <i>BCL2-like 1</i>                                                                              | BCL2L1    | 212312_at    | -1.37 | 0.02 |
| <i>BEN domain containing 3</i>                                                                  | BEND3     | 227920_at    | 1.79  | 0.00 |
| <i>betaine--homocysteine S-methyltransferase 2</i>                                              | BHMT2     | 219902_at    | -2.12 | 0.04 |
| <i>bicaudal D homolog 2 (Drosophila)</i>                                                        | BICD2     | 1553021_s_at | -1.22 | 0.04 |
| <i>bromodomain and WD repeat domain containing 1</i>                                            | BRWD1     | 219280_at    | 1.52  | 0.00 |
| <i>BTB (POZ) domain containing 1</i>                                                            | BTBD1     | 217945_at    | 1.49  | 0.01 |
| <i>BTB (POZ) domain containing 11</i>                                                           | BTBD11    | 238692_at    | 4.68  | 0.00 |

|                                                             |                  |              |       |      |
|-------------------------------------------------------------|------------------|--------------|-------|------|
| <i>BTG family, member 2</i>                                 | <i>BTG2</i>      | 201236_s_at  | 1.26  | 0.02 |
| <i>butyrophilin, subfamily 2, member A1</i>                 | <i>BTN2A1</i>    | 215493_x_at  | 1.95  | 0.03 |
| <i>chromosome 11 open reading frame 95</i>                  | <i>C11orf95</i>  | 218641_at    | 1.12  | 0.03 |
| <i>chromosome 12 open reading frame 60</i>                  | <i>C12orf60</i>  | 229888_at    | 3.54  | 0.00 |
| <i>chromosome 12 open reading frame 73</i>                  | <i>C12orf73</i>  | 226943_at    | 1.32  | 0.00 |
| <i>chromosome 14 open reading frame 119</i>                 | <i>C14orf119</i> | 223060_at    | 1.34  | 0.03 |
| <i>chromosome 14 open reading frame 2</i>                   | <i>C14orf2</i>   | 210532_s_at  | 1.20  | 0.00 |
| <i>chromosome 15 open reading frame 39</i>                  | <i>C15orf39</i>  | 215087_at    | -1.85 | 0.00 |
| <i>chromosome 1 open reading frame 111</i>                  | <i>C1orf111</i>  | 231163_at    | -3.25 | 0.01 |
| <i>chromosome 2 open reading frame 40</i>                   | <i>C2orf40</i>   | 223623_at    | -2.08 | 0.00 |
| <i>chromosome 2 open reading frame 68</i>                   | <i>C2orf68</i>   | 221878_at    | 1.62  | 0.01 |
| <i>chromosome 2 open reading frame 68</i>                   | <i>C2orf68</i>   | 65472_at     | 1.40  | 0.00 |
| <i>chromosome 5 open reading frame 24</i>                   | <i>C5orf24</i>   | 229098_s_at  | -2.30 | 0.01 |
| <i>chromosome 6 open reading frame 141</i>                  | <i>C6orf141</i>  | 1552575_a_at | -1.95 | 0.02 |
| <i>chromosome 6 open reading frame 165</i>                  | <i>C6orf165</i>  | 230273_at    | -1.69 | 0.00 |
| <i>calcium channel flower domain containing 1</i>           | <i>CACFD1</i>    | 61874_at     | -1.43 | 0.01 |
| <i>calcium channel, voltage-dependent, beta 2 subunit</i>   | <i>CACNB2</i>    | 1559419_at   | 2.95  | 0.04 |
| <i>calcium/calmodulin-dependent protein kinase II gamma</i> | <i>CAMK2G</i>    | 212757_s_at  | 1.41  | 0.05 |
| <i>CAP, adenylate cyclase-associated protein 1 (yeast)</i>  | <i>CAP1</i>      | 200625_s_at  | 1.08  | 0.02 |
| <i>calpain 6</i>                                            | <i>CAPN6</i>     | 202965_s_at  | -2.91 | 0.01 |
| <i>caspase 4, apoptosis-related cysteine peptidase</i>      | <i>CASP4</i>     | 213596_at    | 1.60  | 0.00 |
| <i>caspase 4, apoptosis-related cysteine peptidase</i>      | <i>CASP4</i>     | 209310_s_at  | 1.14  | 0.04 |
| <i>chromobox homolog 6</i>                                  | <i>CBX6</i>      | 202047_s_at  | -1.37 | 0.02 |
| <i>coiled-coil domain containing 157</i>                    | <i>CCDC157</i>   | 232920_at    | 1.42  | 0.04 |
| <i>coiled-coil domain containing 18</i>                     | <i>CCDC18</i>    | 228022_at    | 1.31  | 0.00 |
| <i>coiled-coil domain containing 186</i>                    | <i>CCDC186</i>   | 229399_at    | 1.57  | 0.04 |
| <i>cyclin J</i>                                             | <i>CCNJ</i>      | 1557830_at   | 2.00  | 0.02 |
| <i>cyclin K</i>                                             | <i>CCNK</i>      | 225824_at    | 1.43  | 0.00 |
| <i>chemokine (C-C motif) receptor 2</i>                     | <i>CCR2</i>      | 207794_at    | 2.48  | 0.01 |
| <i>chemokine (C-C motif) receptor 4</i>                     | <i>CCR4</i>      | 208376_at    | 3.37  | 0.00 |
| <i>chemokine (C-C motif) receptor 6</i>                     | <i>CCR6</i>      | 206983_at    | 1.31  | 0.04 |
| <i>chaperonin containing TCP1, subunit 8 (theta)</i>        | <i>CCT8</i>      | 200873_s_at  | 1.27  | 0.00 |
| <i>CD28 molecule</i>                                        | <i>CD28</i>      | 211861_x_at  | 3.32  | 0.04 |
| <i>CD59 molecule, complement regulatory protein</i>         | <i>CD59</i>      | 228748_at    | 3.05  | 0.03 |
| <i>cytidine and dCMP deaminase domain containing 1</i>      | <i>CDADC1</i>    | 223527_s_at  | 2.10  | 0.00 |
| <i>cell division cycle 42</i>                               | <i>CDC42</i>     | 214230_at    | 1.79  | 0.02 |
| <i>CDC42 effector protein (Rho GTPase binding) 2</i>        | <i>CDC42EP2</i>  | 209850_s_at  | -1.47 | 0.01 |
| <i>CDC42 effector protein (Rho GTPase binding) 3</i>        | <i>CDC42EP3</i>  | 225685_at    | 1.44  | 0.00 |
| <i>cell division cycle associated 7-like</i>                | <i>CDCA7L</i>    | 225081_s_at  | 1.27  | 0.04 |

|                                                                                |                   |              |       |      |
|--------------------------------------------------------------------------------|-------------------|--------------|-------|------|
| <i>cyclin-dependent kinase 17</i>                                              | <i>CDK17</i>      | 206474_at    | 1.35  | 0.04 |
| <i>cyclin-dependent kinase 2</i>                                               | <i>CDK2</i>       | 211804_s_at  | -2.36 | 0.00 |
| <i>cyclin-dependent kinase 3</i>                                               | <i>CDK3</i>       | 207188_at    | 3.42  | 0.00 |
| <i>cyclin-dependent kinase inhibitor 1C (p57, Kip2)</i>                        | <i>CDKN1C</i>     | 219533_at    | -1.18 | 0.04 |
| <i>CCAAT/enhancer binding protein (C/EBP), delta</i>                           | <i>CEBPD</i>      | 213006_at    | 3.28  | 0.04 |
| <i>centrosomal protein 128kDa</i>                                              | <i>CEP128</i>     | 233859_at    | 3.47  | 0.04 |
| <i>centrosomal protein 63kDa</i>                                               | <i>CEP63</i>      | 222151_s_at  | 1.35  | 0.00 |
| <i>ceramide synthase 5</i>                                                     | <i>CERS5</i>      | 224951_at    | 1.36  | 0.00 |
| <i>carboxylesterase 1 pseudogene 1</i>                                         | <i>CES1P1</i>     | 206824_at    | -1.27 | 0.05 |
| <i>cilia and flagella associated protein 36</i>                                | <i>CFAP36</i>     | 224968_at    | 1.73  | 0.05 |
| <i>cilia and flagella associated protein 70</i>                                | <i>CFAP70</i>     | 215849_x_at  | -3.58 | 0.00 |
| <i>cilia and flagella associated protein 99</i>                                | <i>CFAP99</i>     | 1569172_a_at | -2.15 | 0.00 |
| <i>cripto, FRL-1, cryptic family 1</i>                                         | <i>CFC1/CFC1B</i> | 223753_s_at  | 3.37  | 0.00 |
| <i>complement factor H-related 1</i>                                           | <i>CFHR1</i>      | 215388_s_at  | 2.43  | 0.00 |
| <i>glycoprotein hormones, alpha polypeptide</i>                                | <i>CGA</i>        | 204637_at    | -2.03 | 0.00 |
| <i>chromodomain helicase DNA binding protein 5</i>                             | <i>CHD5</i>       | 213965_s_at  | -1.75 | 0.03 |
| <i>choline dehydrogenase</i>                                                   | <i>CHDH</i>       | 230484_at    | -4.48 | 0.00 |
| <i>checkpoint kinase 1</i>                                                     | <i>CHEK1</i>      | 229423_at    | 1.67  | 0.02 |
| <i>charged multivesicular body protein 2B</i>                                  | <i>CHMP2B</i>     | 202537_s_at  | 1.26  | 0.00 |
| <i>carbohydrate (N-acetylglucosamine-6-O) sulfotransferase 2</i>               | <i>CHST2</i>      | 1556592_at   | 1.70  | 0.01 |
| <i>carbohydrate (N-acetylglucosamine-6-O) sulfotransferase 2</i>               | <i>CHST2</i>      | 1556593_s_at | 1.63  | 0.00 |
| <i>CTF8, chromosome transmission fidelity factor 8 homolog (S. cerevisiae)</i> | <i>CHTF8</i>      | 228178_s_at  | -1.46 | 0.01 |
| <i>churchill domain containing 1</i>                                           | <i>CHURC1</i>     | 226736_at    | 3.59  | 0.00 |
| <i>chloride channel, voltage-sensitive Ka</i>                                  | <i>CLCNKA</i>     | 207047_s_at  | 1.55  | 0.01 |
| <i>C-type lectin domain family 4, member D</i>                                 | <i>CLEC4D</i>     | 1552772_at   | 2.59  | 0.00 |
| <i>C-type lectin domain family 4, member D</i>                                 | <i>CLEC4D</i>     | 1552773_at   | 2.40  | 0.01 |
| <i>CKLF-like MARVEL transmembrane domain containing 5</i>                      | <i>CMTM5</i>      | 230942_at    | -2.05 | 0.01 |
| <i>CKLF-like MARVEL transmembrane domain containing 7</i>                      | <i>CMTM7</i>      | 226017_at    | -1.20 | 0.02 |
| <i>CCHC-type zinc finger, nucleic acid binding protein</i>                     | <i>CNBP</i>       | 206158_s_at  | 1.32  | 0.04 |
| <i>CCHC-type zinc finger, nucleic acid binding protein</i>                     | <i>CNBP</i>       | 227731_at    | 1.34  | 0.00 |
| <i>ciliary neurotrophic factor</i>                                             | <i>CNTF</i>       | 226812_at    | -1.59 | 0.04 |
| <i>cytochrome c oxidase assembly factor 1 homolog (S. cerevisiae)</i>          | <i>COA1</i>       | 209446_s_at  | -1.52 | 0.02 |
| <i>collagen, type III, alpha 1</i>                                             | <i>COL3A1</i>     | 211161_s_at  | 3.77  | 0.04 |
| <i>collagen, type IV, alpha 5</i>                                              | <i>COL4A5</i>     | 234387_at    | -2.79 | 0.00 |
| <i>coronin 6</i>                                                               | <i>CORO6</i>      | 1552301_a_at | -1.79 | 0.04 |
| <i>cytochrome c oxidase assembly homolog 15 (yeast)</i>                        | <i>COX15</i>      | 221550_at    | 1.41  | 0.00 |
| <i>cytochrome c oxidase subunit VIIa</i>                                       | <i>COX7A2</i>     | 201597_at    | -1.21 | 0.02 |

|                                                                                                 |         |              |       |      |
|-------------------------------------------------------------------------------------------------|---------|--------------|-------|------|
| <i>polypeptide 2 (liver)</i>                                                                    |         |              |       |      |
| <i>carboxypeptidase A3 (mast cell)</i>                                                          | CPA3    | 205624_at    | -1.77 | 0.05 |
| <i>casein beta</i>                                                                              | CSN2    | 207951_at    | -1.91 | 0.03 |
| <i>cysteine-serine-rich nuclear protein 3</i>                                                   | CSRNP3  | 220462_at    | -1.73 | 0.04 |
| <i>CTD nuclear envelope phosphatase 1</i>                                                       | CTDNEP1 | 200035_at    | -1.37 | 0.03 |
| <i>CTD (carboxy-terminal domain, RNA polymerase II, polypeptide A) small phosphatase like 2</i> | CTDSPL2 | 223271_s_at  | 1.77  | 0.02 |
| <i>CWC27 spliceosome-associated protein homolog (S. cerevisiae)</i>                             | CWC27   | 1555495_a_at | 1.76  | 0.02 |
| <i>cytochrome P450, family 4, subfamily V, polypeptide 2</i>                                    | CYP4V2  | 229959_at    | 1.94  | 0.01 |
| <i>death associated protein 3</i>                                                               | DAP3    | 232516_x_at  | -1.60 | 0.01 |
| <i>diazepam binding inhibitor (GABA receptor modulator, acyl-CoA binding protein)</i>           | DBI     | 209389_x_at  | 1.38  | 0.03 |
| <i>dephospho-CoA kinase domain containing decapping enzyme, scavenger</i>                       | DCAKD   | 224522_s_at  | -1.98 | 0.02 |
|                                                                                                 | DCPS    | 218774_at    | 1.25  | 0.02 |
| <i>DEAD (Asp-Glu-Ala-Asp) box helicase 21</i>                                                   | DDX21   | 208152_s_at  | 1.30  | 0.00 |
| <i>DEAD (Asp-Glu-Ala-Asp) box helicase 21</i>                                                   | DDX21   | 224654_at    | 1.21  | 0.04 |
| <i>DEAD (Asp-Glu-Ala-Asp) box helicase 5</i>                                                    | DDX5    | 200033_at    | 1.62  | 0.02 |
| <i>DEAD (Asp-Glu-Ala-Asp) box helicase 5</i>                                                    | DDX5    | 225886_at    | 1.56  | 0.04 |
| <i>DEAD (Asp-Glu-Ala-Asp) box helicase 6</i>                                                    | DDX6    | 204909_at    | -1.65 | 0.04 |
| <i>2,4-dienoyl CoA reductase 2, peroxisomal</i>                                                 | DECR2   | 219664_s_at  | -1.54 | 0.00 |
| <i>defensin, alpha 6, Paneth cell-specific</i>                                                  | DEFA6   | 207814_at    | -1.67 | 0.03 |
| <i>defensin, beta 124</i>                                                                       | DEFB124 | 1568375_at   | -2.85 | 0.03 |
| <i>defensin, beta 124</i>                                                                       | DEFB124 | 1568377_x_at | -2.03 | 0.04 |
| <i>DENN/MADD domain containing 6B</i>                                                           | DENND6B | 220713_at    | -2.85 | 0.04 |
| <i>density-regulated protein</i>                                                                | DENR    | 231896_s_at  | 1.60  | 0.02 |
| <i>deiodinase, iodothyronine, type III</i>                                                      | DIO3    | 207154_at    | -2.92 | 0.02 |
| <i>disrupted in schizophrenia 1</i>                                                             | DISC1   | 217330_at    | -2.22 | 0.02 |
| <i>distal-less homeobox 2</i>                                                                   | DLX2    | 207147_at    | 4.67  | 0.02 |
| <i>dystrophin</i>                                                                               | DMD     | 207660_at    | -1.95 | 0.00 |
| <i>aspartyl aminopeptidase</i>                                                                  | DNPEP   | 215135_at    | -2.15 | 0.00 |
| <i>dual-specificity tyrosine-(Y)-phosphorylation regulated kinase 1B</i>                        | DYRK1B  | 204954_s_at  | -2.29 | 0.05 |
| <i>E2F transcription factor 3</i>                                                               | E2F3    | 203693_s_at  | 1.80  | 0.04 |
| <i>estrogen receptor binding site associated, antigen, 9</i>                                    | EBAG9   | 204278_s_at  | 1.30  | 0.00 |
| <i>endogenous Bornavirus-like nucleoprotein 3</i>                                               | EBLN3   | 225640_at    | -1.27 | 0.03 |
| <i>EH domain binding protein 1-like 1</i>                                                       | EHBP1L1 | 1557228_at   | -1.60 | 0.04 |
| <i>ELK4, ETS-domain protein (SRF accessory protein 1)</i>                                       | ELK4    | 205994_at    | 1.41  | 0.05 |
| <i>ELK4, ETS-domain protein (SRF accessory protein 1)</i>                                       | ELK4    | 214831_at    | 3.35  | 0.02 |
| <i>engulfment and cell motility 2</i>                                                           | ELMO2   | 221528_s_at  | 1.42  | 0.00 |
| <i>engulfment and cell motility 2</i>                                                           | ELMO2   | 55692_at     | 1.24  | 0.01 |
| <i>ER membrane protein complex subunit 4</i>                                                    | EMC4    | 223043_at    | 1.22  | 0.04 |
| <i>EMI domain containing 1</i>                                                                  | EMID1   | 213779_at    | -2.14 | 0.01 |



|                                                                            |                    |              |       |      |
|----------------------------------------------------------------------------|--------------------|--------------|-------|------|
| <i>echinoderm microtubule associated protein like 4</i>                    | <i>EML4</i>        | 223068_at    | 1.59  | 0.00 |
| <i>energy homeostasis associated ectonucleotide</i>                        | <i>ENHO</i>        | 228403_at    | -2.43 | 0.03 |
| <i>pyrophosphatase/phosphodiesterase 2 epsin 3</i>                         | <i>ENPP2</i>       | 209392_at    | 1.92  | 0.02 |
| <i>ERC2 intronic transcript 1 (non-protein coding)</i>                     | <i>EPN3</i>        | 223895_s_at  | -2.33 | 0.02 |
| <i>ERC2 intronic transcript 1 (non-protein coding)</i>                     | <i>ERC2-IT1</i>    | 208247_at    | -3.24 | 0.04 |
| <i>ERO1-like (S. cerevisiae)</i>                                           | <i>ERO1L</i>       | 222646_s_at  | 2.16  | 0.03 |
| <i>estrogen receptor 2 (ER beta)</i>                                       | <i>ESR2</i>        | 210780_at    | -1.67 | 0.01 |
| <i>v-ets avian erythroblastosis virus E26 oncogene homolog 2</i>           | <i>ETS2</i>        | 201328_at    | 1.73  | 0.02 |
| <i>exocyst complex component 5</i>                                         | <i>EXOC5</i>       | 222726_s_at  | 1.74  | 0.04 |
| <i>exosome component 9</i>                                                 | <i>EXOSC9</i>      | 205061_s_at  | 1.38  | 0.02 |
| <i>coagulation factor X</i>                                                | <i>F10</i>         | 205620_at    | 3.30  | 0.02 |
| <i>FAM170B antisense RNA 1</i>                                             | <i>FAM170B-AS1</i> | 1557660_s_at | -2.03 | 0.00 |
| <i>family with sequence similarity 178, member A</i>                       | <i>FAM178A</i>     | 203481_at    | 1.82  | 0.00 |
| <i>family with sequence similarity 198, member B</i>                       | <i>FAM198B</i>     | 219872_at    | 3.43  | 0.00 |
| <i>family with sequence similarity 49, member B</i>                        | <i>FAM49B</i>      | 228987_at    | 1.23  | 0.02 |
| <i>Fanconi anemia, complementation group F</i>                             | <i>FANCF</i>       | 222713_s_at  | 1.52  | 0.02 |
| <i>F-box and leucine-rich repeat protein 8</i>                             | <i>FBXL8</i>       | 220080_at    | -3.20 | 0.00 |
| <i>F-box protein 27</i>                                                    | <i>FBXO27</i>      | 235169_at    | -2.84 | 0.01 |
| <i>F-box protein 32</i>                                                    | <i>FBXO32</i>      | 225345_s_at  | 2.41  | 0.00 |
| <i>fer (fps/fes related) tyrosine kinase</i>                               | <i>FER</i>         | 206412_at    | 2.21  | 0.00 |
| <i>fermitin family member 3</i>                                            | <i>FERMT3</i>      | 223303_at    | -1.20 | 0.02 |
| <i>fibroblast growth factor 2 (basic)</i>                                  | <i>FGF2</i>        | 204421_s_at  | -2.01 | 0.02 |
| <i>fumarate hydratase</i>                                                  | <i>FH</i>          | 203032_s_at  | 1.99  | 0.03 |
| <i>farnesyltransferase, CAAX box, alpha</i>                                | <i>FNTA</i>        | 209471_s_at  | 1.44  | 0.02 |
| <i>farnesyltransferase, CAAX box, beta</i>                                 | <i>FNTB</i>        | 204764_at    | 2.10  | 0.02 |
| <i>formyl peptide receptor 1</i>                                           | <i>FPR1</i>        | 205118_at    | 2.25  | 0.03 |
| <i>ferritin, heavy polypeptide-like 17</i>                                 | <i>FTHL17</i>      | 224379_at    | -1.94 | 0.01 |
| <i>GTPase activating protein (SH3 domain) binding protein 1</i>            | <i>G3BP1</i>       | 244396_at    | 2.26  | 0.00 |
| <i>growth arrest and DNA-damage-inducible, gamma interacting protein 1</i> | <i>GADD45G1P1</i>  | 225495_x_at  | -1.54 | 0.03 |
| <i>galanin/GMAP prepropeptide</i>                                          | <i>GAL</i>         | 214240_at    | -2.88 | 0.04 |
| <i>galactokinase 1</i>                                                     | <i>GALK1</i>       | 229458_s_at  | -1.64 | 0.04 |
| <i>growth arrest-specific 2 like 1</i>                                     | <i>GAS2L1</i>      | 209729_at    | -1.81 | 0.03 |
| <i>GATA zinc finger domain containing 2A</i>                               | <i>GATAD2A</i>     | 218131_s_at  | 1.31  | 0.02 |
| <i>glutamyl-tRNA(Gln) amidotransferase, subunit B</i>                      | <i>GATB</i>        | 233593_at    | 2.69  | 0.00 |
| <i>GRIP and coiled-coil domain containing 1</i>                            | <i>GCC1</i>        | 243306_s_at  | -2.08 | 0.03 |
| <i>ganglioside induced differentiation associated protein 2</i>            | <i>GDAP2</i>       | 219473_at    | 2.36  | 0.01 |
| <i>GDP dissociation inhibitor 2</i>                                        | <i>GDI2</i>        | 200009_at    | 1.10  | 0.00 |

|                                                                                                       |                |              |       |      |
|-------------------------------------------------------------------------------------------------------|----------------|--------------|-------|------|
| <i>G elongation factor, mitochondrial 2</i>                                                           | <i>GFM2</i>    | 231917_at    | 2.70  | 0.02 |
| <i>G elongation factor, mitochondrial 2</i>                                                           | <i>GFM2</i>    | 231918_s_at  | 2.81  | 0.00 |
| <i>glutamine--fructose-6-phosphate transaminase 1</i>                                                 | <i>GFPT1</i>   | 227027_at    | 2.20  | 0.05 |
| <i>golgi-associated, gamma adaptin ear containing, ARF binding protein 2</i>                          | <i>GGA2</i>    | 210658_s_at  | 1.49  | 0.03 |
| <i>gamma-glutamyltransferase 1</i>                                                                    | <i>GGT1</i>    | 233837_at    | -2.07 | 0.01 |
| <i>GINS complex subunit 4 (Sld5 homolog)</i>                                                          | <i>GINS4</i>   | 240778_at    | -2.97 | 0.02 |
| <i>glucagon-like peptide 1 receptor</i>                                                               | <i>GLP1R</i>   | 208400_at    | -2.05 | 0.01 |
| <i>guanine nucleotide binding protein (G protein), alpha inhibiting activity polypeptide 2</i>        | <i>GNAI2</i>   | 215996_at    | -1.59 | 0.03 |
| <i>guanine nucleotide binding protein (G protein), beta polypeptide 4</i>                             | <i>GNB4</i>    | 223487_x_at  | -1.73 | 0.02 |
| <i>glucosamine (UDP-N-acetyl)-2-epimerase/N-acetylmannosamine kinase</i>                              | <i>GNE</i>     | 205042_at    | 1.85  | 0.00 |
| <i>golgin A7</i>                                                                                      | <i>GOLGA7</i>  | 217819_at    | 1.41  | 0.00 |
| <i>golgi transport 1B</i>                                                                             | <i>GOLT1B</i>  | 222552_at    | 2.27  | 0.03 |
| <i>golgi-associated PDZ and coiled-coil motif containing</i>                                          | <i>GOPC</i>    | 227214_at    | 1.70  | 0.02 |
| <i>glycoprotein Ib (platelet), beta polypeptide</i>                                                   | <i>GP1BB</i>   | 206655_s_at  | -1.75 | 0.00 |
| <i>glycosylphosphatidylinositol anchor attachment 1</i>                                               | <i>GPAA1</i>   | 215690_x_at  | -1.39 | 0.01 |
| <i>glycosylphosphatidylinositol anchor attachment 1</i>                                               | <i>GPAA1</i>   | 201618_x_at  | -1.47 | 0.02 |
| <i>G patch domain containing 4</i>                                                                    | <i>GPATCH4</i> | 220596_at    | -1.64 | 0.03 |
| <i>glycerol-3-phosphate dehydrogenase 1 (soluble)</i>                                                 | <i>GPD1</i>    | 204997_at    | -2.64 | 0.00 |
| <i>glycerol-3-phosphate dehydrogenase 1 (soluble)</i>                                                 | <i>GPD1</i>    | 1563035_x_at | -2.62 | 0.05 |
| <i>G protein-coupled receptor 39</i>                                                                  | <i>GPR39</i>   | 229105_at    | -3.02 | 0.02 |
| <i>growth factor receptor-bound protein 2</i>                                                         | <i>GRB2</i>    | 215075_s_at  | -1.54 | 0.00 |
| <i>glutamate receptor, ionotropic, kainate 5</i>                                                      | <i>GRIK5</i>   | 217509_x_at  | -2.53 | 0.00 |
| <i>G-rich RNA sequence binding factor 1</i>                                                           | <i>GRSF1</i>   | 221917_s_at  | 1.67  | 0.01 |
| <i>3-hydroxyacyl-CoA dehydratase 3</i>                                                                | <i>HACD3</i>   | 222405_at    | 1.33  | 0.00 |
| <i>HMG-box transcription factor 1</i>                                                                 | <i>HBP1</i>    | 209102_s_at  | 1.44  | 0.03 |
| <i>HLA complex group 11 (non-protein coding)</i>                                                      | <i>HCG11</i>   | 1557169_x_at | 4.15  | 0.00 |
| <i>headcase homolog (Drosophila)</i>                                                                  | <i>HECA</i>    | 230582_at    | -1.61 | 0.02 |
| <i>HECT and RLD domain containing E3 ubiquitin protein ligase family member 6</i>                     | <i>HERC6</i>   | 1563659_at   | 1.98  | 0.00 |
| <i>homocysteine-inducible, endoplasmic reticulum stress-inducible, ubiquitin-like domain member 1</i> | <i>HERPUD1</i> | 217168_s_at  | 1.34  | 0.02 |
| <i>human immunodeficiency virus type I enhancer binding protein 2</i>                                 | <i>HIVEP2</i>  | 243254_at    | 2.10  | 0.00 |
| <i>high mobility group AT-hook 2</i>                                                                  | <i>HMGA2</i>   | 1561633_at   | -1.63 | 0.02 |
| <i>hepatocyte nuclear factor 4, alpha</i>                                                             | <i>HNF4A</i>   | 230914_at    | -3.27 | 0.00 |
| <i>hepatocyte nuclear factor 4, alpha</i>                                                             | <i>HNF4A</i>   | 230772_at    | -2.21 | 0.01 |
| <i>heterogeneous nuclear ribonucleoprotein</i>                                                        | <i>HNRNPA3</i> | 206809_s_at  | 1.38  | 0.01 |

|                                                                                 |                     |              |       |      |
|---------------------------------------------------------------------------------|---------------------|--------------|-------|------|
| <i>A3</i>                                                                       |                     |              |       |      |
| <i>heterogeneous nuclear ribonucleoprotein A3</i>                               | <i>HNRNPA3</i>      | 211932_at    | 1.26  | 0.03 |
| <i>heterogeneous nuclear ribonucleoprotein D-like</i>                           | <i>HNRNPDL</i>      | 1554678_s_at | 1.49  | 0.04 |
| <i>heterogeneous nuclear ribonucleoprotein D-like</i>                           | <i>HNRNPDL</i>      | 201993_x_at  | 1.40  | 0.02 |
| <i>heterogeneous nuclear ribonucleoprotein U (scaffold attachment factor A)</i> | <i>HNRNPU</i>       | 200594_x_at  | 1.37  | 0.04 |
| <i>HOXB cluster antisense RNA 3</i>                                             | <i>HOXB-AS3</i>     | 230743_at    | 1.72  | 0.01 |
| <i>heat shock factor binding protein 1</i>                                      | <i>HSBP1</i>        | 200942_s_at  | 1.36  | 0.04 |
| <i>heat shock 70kDa protein 4</i>                                               | <i>HSPA4</i>        | 211015_s_at  | 1.27  | 0.04 |
| <i>heat shock 70kDa protein 8</i>                                               | <i>HSPA8</i>        | 208687_x_at  | 1.30  | 0.00 |
| <i>heat shock 70kDa protein 8</i>                                               | <i>HSPA8</i>        | 210338_s_at  | 1.52  | 0.04 |
| <i>heat shock 70kDa protein 8</i>                                               | <i>HSPA8</i>        | 224187_x_at  | 1.22  | 0.00 |
| <i>HUS1 checkpoint homolog (S. pombe)</i>                                       | <i>HUS1</i>         | 217618_x_at  | 1.36  | 0.04 |
| <i>isoleucyl-tRNA synthetase 2, mitochondrial</i>                               | <i>IARS2</i>        | 217900_at    | 1.74  | 0.04 |
| <i>interferon, alpha 1</i>                                                      | <i>IFNA1/IFNA13</i> | 208375_at    | 2.09  | 0.01 |
| <i>interferon gamma receptor 1</i>                                              | <i>IFNGR1</i>       | 242903_at    | 1.30  | 0.02 |
| <i>intraflagellar transport 74</i>                                              | <i>IFT74</i>        | 61732_r_at   | 1.57  | 0.01 |
| <i>immunoglobulin lambda constant 1 (Mcg marker)</i>                            | <i>IGLC1</i>        | 1565495_at   | -2.88 | 0.04 |
| <i>IKAROS family zinc finger 1 (Ikaros)</i>                                     | <i>IKZF1</i>        | 227346_at    | 1.17  | 0.00 |
| <i>interleukin 12 receptor, beta 1</i>                                          | <i>IL12RB1</i>      | 239522_at    | -1.29 | 0.04 |
| <i>interleukin 7</i>                                                            | <i>IL7</i>          | 206693_at    | 2.33  | 0.04 |
| <i>interleukin enhancer binding factor 3, 90kDa</i>                             | <i>ILF3</i>         | 217805_at    | 1.51  | 0.00 |
| <i>inverted formin, FH2 and WH2 domain containing</i>                           | <i>INF2</i>         | 222534_s_at  | -2.38 | 0.00 |
| <i>insulin receptor</i>                                                         | <i>INSR</i>         | 226216_at    | 2.14  | 0.04 |
| <i>integrator complex subunit 5</i>                                             | <i>INTS5</i>        | 53968_at     | -1.49 | 0.00 |
| <i>integrator complex subunit 7</i>                                             | <i>INTS7</i>        | 218783_at    | 1.59  | 0.04 |
| <i>inversin</i>                                                                 | <i>INVS</i>         | 210114_at    | -1.56 | 0.01 |
| <i>ISY1 splicing factor homolog (S. cerevisiae)</i>                             | <i>ISY1</i>         | 223831_x_at  | 1.43  | 0.02 |
| <i>integrin, beta 3 (platelet glycoprotein IIIa, antigen CD61)</i>              | <i>ITGB3</i>        | 204627_s_at  | -2.23 | 0.00 |
| <i>inter-alpha-trypsin inhibitor heavy chain family, member 6</i>               | <i>ITIH6</i>        | 234894_at    | -1.99 | 0.01 |
| <i>integral membrane protein 2C</i>                                             | <i>ITM2C</i>        | 221004_s_at  | -1.44 | 0.00 |
| <i>intersectin 2</i>                                                            | <i>ITSN2</i>        | 209907_s_at  | 1.57  | 0.00 |
| <i>influenza virus NS1A binding protein</i>                                     | <i>IVNS1ABP</i>     | 206245_s_at  | 1.37  | 0.03 |
| <i>Janus kinase 2</i>                                                           | <i>JAK2</i>         | 205842_s_at  | 1.78  | 0.00 |
| <i>jumonji domain containing 4</i>                                              | <i>JMJD4</i>        | 230810_at    | 2.53  | 0.00 |
| <i>katanin p80 (WD repeat containing) subunit B 1</i>                           | <i>KATNB1</i>       | 203162_s_at  | -1.37 | 0.00 |
| <i>potassium channel, voltage gated subfamily A regulatory beta subunit 1</i>   | <i>KCNAB1</i>       | 210078_s_at  | -1.58 | 0.04 |

|                                                                               |                     |              |       |      |
|-------------------------------------------------------------------------------|---------------------|--------------|-------|------|
| <i>potassium channel, voltage gated subfamily E regulatory beta subunit 1</i> | <i>KCNE1</i>        | 208514_at    | -1.99 | 0.02 |
| <i>potassium channel tetramerization domain containing 13</i>                 | <i>KCTD13</i>       | 45653_at     | -1.18 | 0.01 |
| <i>KH domain containing, RNA binding, signal transduction associated 1</i>    | <i>KHDRBS1</i>      | 214185_at    | 1.45  | 0.00 |
| <i>KH domain containing, RNA binding, signal transduction associated 1</i>    | <i>KHDRBS1</i>      | 200040_at    | 1.39  | 0.04 |
| <i>KIAA0368</i>                                                               | <i>KIAA0368</i>     | 214356_s_at  | 1.43  | 0.01 |
| <i>KIAA0753</i>                                                               | <i>KIAA0753</i>     | 204711_at    | 1.47  | 0.02 |
| <i>KIAA1211</i>                                                               | <i>KIAA1211</i>     | 227231_at    | 3.95  | 0.01 |
| <i>KIAA1468</i>                                                               | <i>KIAA1468</i>     | 225506_at    | 2.07  | 0.04 |
| <i>KIAA1614 antisense RNA 1</i>                                               | <i>KIAA1614-AS1</i> | 232320_at    | -1.44 | 0.01 |
| <i>kinesin family member 14</i>                                               | <i>KIF14</i>        | 236641_at    | 4.91  | 0.02 |
| <i>kinesin family member 3B</i>                                               | <i>KIF3B</i>        | 225205_at    | 1.22  | 0.00 |
| <i>kinesin family member 5A</i>                                               | <i>KIF5A</i>        | 229921_at    | -1.83 | 0.01 |
| <i>Kruppel-like factor 14</i>                                                 | <i>KLF14</i>        | 1552814_a_at | -1.75 | 0.03 |
| <i>kelch-like family member 17</i>                                            | <i>KLHL17</i>       | 1555650_at   | -2.03 | 0.02 |
| <i>kelch-like family member 35</i>                                            | <i>KLHL35</i>       | 215748_at    | 3.15  | 0.03 |
| <i>lysine (K)-specific methyltransferase 2A</i>                               | <i>KMT2A</i>        | 244110_at    | 2.01  | 0.00 |
| <i>kinetochore associated 1</i>                                               | <i>KNTC1</i>        | 206316_s_at  | 1.88  | 0.01 |
| <i>karyopherin alpha 4 (importin alpha 3)</i>                                 | <i>KPNA4</i>        | 213567_at    | -1.50 | 0.02 |
| <i>keratin 8 pseudogene 12</i>                                                | <i>KRT8P12</i>      | 222060_at    | -1.59 | 0.03 |
| <i>laminin, alpha 2</i>                                                       | <i>LAMA2</i>        | 213519_s_at  | -1.68 | 0.03 |
| <i>lysosomal-associated membrane protein 1</i>                                | <i>LAMP1</i>        | 201553_s_at  | -1.07 | 0.00 |
| <i>leucine aminopeptidase 3</i>                                               | <i>LAP3</i>         | 217933_s_at  | 1.32  | 0.00 |
| <i>La ribonucleoprotein domain family, member 7</i>                           | <i>LARP7</i>        | 215246_at    | 2.38  | 0.03 |
| <i>LIM domain binding 1</i>                                                   | <i>LDB1</i>         | 35160_at     | -1.66 | 0.00 |
| <i>LIM domain binding 1</i>                                                   | <i>LDB1</i>         | 203451_at    | -1.55 | 0.01 |
| <i>low density lipoprotein receptor class A domain containing 4</i>           | <i>LDLRAD4</i>      | 209573_s_at  | 1.91  | 0.00 |
| <i>leucine zipper-EF-hand containing transmembrane protein 1</i>              | <i>LETM1</i>        | 218939_at    | -1.59 | 0.02 |
| <i>lectin, galactoside-binding-like</i>                                       | <i>LGALS1</i>       | 219998_at    | -1.73 | 0.03 |
| <i>lipoma HMGIC fusion partner</i>                                            | <i>LHFP</i>         | 231411_at    | 3.13  | 0.05 |
| <i>lin-52 DREAM MuvB core complex component</i>                               | <i>LIN52</i>        | 228583_at    | 1.58  | 0.04 |
| <i>long intergenic non-protein coding RNA 173</i>                             | <i>LINC00173</i>    | 1563369_at   | -1.57 | 0.01 |
| <i>long intergenic non-protein coding RNA 556</i>                             | <i>LINC00556</i>    | 1560988_a_at | -2.26 | 0.00 |
| <i>long intergenic non-protein coding RNA 883</i>                             | <i>LINC00883</i>    | 235606_at    | 6.23  | 0.01 |
| <i>long intergenic non-protein coding RNA 1204</i>                            | <i>LINC01204</i>    | 1561352_at   | -2.41 | 0.04 |
| <i>long intergenic non-protein coding RNA 1314</i>                            | <i>LINC01314</i>    | 215126_at    | 1.80  | 0.01 |
| <i>long intergenic non-protein coding RNA</i>                                 | <i>LINC01526</i>    | 1562157_at   | 1.55  | 0.03 |

|                                                                                               |                     |              |       |      |
|-----------------------------------------------------------------------------------------------|---------------------|--------------|-------|------|
| 1526                                                                                          |                     |              |       |      |
| <i>long intergenic non-protein coding RNA</i>                                                 | <i>LINC01532</i>    | 1559303_at   | -1.75 | 0.02 |
| 1532                                                                                          |                     |              |       |      |
| <i>LIM domain only 1 (rhombotin 1)</i>                                                        | <i>LMO1</i>         | 206718_at    | -1.78 | 0.02 |
| <i>uncharacterized LOC100271832</i>                                                           | <i>LOC100271832</i> | 1556999_at   | 11.54 | 0.00 |
| <i>uncharacterized LOC100288123</i>                                                           | <i>LOC100288123</i> | 230940_at    | -2.48 | 0.04 |
| <i>uncharacterized LOC100506083</i>                                                           | <i>LOC100506083</i> | 1568787_at   | 2.73  | 0.00 |
| <i>uncharacterized LOC100506122</i>                                                           | <i>LOC100506122</i> | 1561228_at   | -1.68 | 0.01 |
| <i>uncharacterized LOC100506142</i>                                                           | <i>LOC100506142</i> | 1556662_at   | 1.76  | 0.00 |
| <i>uncharacterized LOC100506403</i>                                                           | <i>LOC100506403</i> | 209359_x_at  | -2.12 | 0.02 |
| <i>uncharacterized LOC100507388</i>                                                           | <i>LOC100507388</i> | 221183_at    | -2.80 | 0.01 |
| <i>uncharacterized LOC101593348</i>                                                           | <i>LOC101593348</i> | 243272_at    | 4.42  | 0.01 |
| <i>uncharacterized LOC101927151</i>                                                           | <i>LOC101927151</i> | 240121_x_at  | -1.20 | 0.01 |
| <i>uncharacterized LOC101927539</i>                                                           | <i>LOC101927539</i> | 1570182_at   | -1.53 | 0.02 |
| <i>uncharacterized LOC101927723</i>                                                           | <i>LOC101927723</i> | 1562902_at   | -3.01 | 0.01 |
| <i>uncharacterized LOC101928417</i>                                                           | <i>LOC101928417</i> | 1562857_at   | -2.43 | 0.03 |
| <i>uncharacterized LOC101928921</i>                                                           | <i>LOC101928921</i> | 1554957_at   | -2.30 | 0.04 |
| <i>uncharacterized LOC101929172</i>                                                           | <i>LOC101929172</i> | 1562078_at   | -3.14 | 0.01 |
| <i>uncharacterized LOC103611081</i>                                                           | <i>LOC103611081</i> | 235660_at    | -1.81 | 0.01 |
| <i>uncharacterized LOC283214</i>                                                              | <i>LOC283214</i>    | 1561491_at   | 2.22  | 0.02 |
| <i>uncharacterized LOC286272</i>                                                              | <i>LOC286272</i>    | 232182_at    | 2.18  | 0.02 |
| <i>uncharacterized LOC339988</i>                                                              | <i>LOC339988</i>    | 1562698_x_at | -1.39 | 0.00 |
| <i>uncharacterized LOC339988</i>                                                              | <i>LOC339988</i>    | 1562697_at   | -1.30 | 0.02 |
| <i>uncharacterized LOC400692</i>                                                              | <i>LOC400692</i>    | 1555798_at   | 2.26  | 0.02 |
| <i>uncharacterized LOC440173</i>                                                              | <i>LOC440173</i>    | 229761_at    | -3.43 | 0.00 |
| <i>putative POM121-like protein 1-like lipid phosphate phosphatase-related protein type 1</i> | <i>LOC728093</i>    | 213605_s_at  | 1.36  | 0.00 |
|                                                                                               | <i>LPPR1</i>        | 1570250_at   | -2.26 | 0.01 |
| <i>leucine-rich repeats and calponin homology (CH) domain containing 2</i>                    | <i>LRCH2</i>        | 227688_at    | -2.12 | 0.05 |
| <i>leucine rich repeat and fibronectin type III domain containing 1</i>                       | <i>LRFN1</i>        | 232486_at    | -1.36 | 0.04 |
| <i>leucine rich repeat and fibronectin type III domain containing 5</i>                       | <i>LRFN5</i>        | 230644_at    | 2.52  | 0.02 |
| <i>leucine rich repeat containing 14</i>                                                      | <i>LRRC14</i>       | 203495_at    | -1.62 | 0.04 |
| <i>leucine rich repeat containing 27</i>                                                      | <i>LRRC27</i>       | 228884_at    | -1.59 | 0.01 |

|                                                                                                                                     |                    |             |       |      |
|-------------------------------------------------------------------------------------------------------------------------------------|--------------------|-------------|-------|------|
| <i>leucine-rich repeats and death domain containing 1</i>                                                                           | <i>LRRD1</i>       | 1569783_at  | -2.55 | 0.00 |
| <i>LSM14B, SCD6 homolog B (S. cerevisiae)</i>                                                                                       | <i>LSM14B</i>      | 224171_at   | 1.40  | 0.05 |
| <i>LSM8 homolog, U6 small nuclear RNA associated (S. cerevisiae)</i>                                                                | <i>LSM8</i>        | 219119_at   | 1.40  | 0.03 |
| <i>LURAP1L antisense RNA 1</i>                                                                                                      | <i>LURAP1L-AS1</i> | 242893_at   | -2.02 | 0.00 |
| <i>Ly1 antibody reactive melanoma antigen family H1 metastasis associated lung adenocarcinoma transcript 1 (non-protein coding)</i> | <i>LYAR</i>        | 223414_s_at | 1.30  | 0.04 |
|                                                                                                                                     | <i>MAGEH1</i>      | 218573_at   | 1.18  | 0.03 |
|                                                                                                                                     | <i>MALAT1</i>      | 224558_s_at | 2.18  | 0.03 |
| <i>mitogen-activated protein kinase kinase 5</i>                                                                                    | <i>MAP2K5</i>      | 216765_at   | 2.41  | 0.02 |
| <i>mitogen-activated protein kinase kinase 6</i>                                                                                    | <i>MAP2K6</i>      | 205698_s_at | 1.47  | 0.01 |
| <i>membrane-associated ring finger (C3HC4) 1, E3 ubiquitin protein ligase</i>                                                       | <i>MARCH1</i>      | 219574_at   | 2.21  | 0.03 |
| <i>methionine adenosyltransferase II, alpha</i>                                                                                     | <i>MAT2A</i>       | 200769_s_at | 1.61  | 0.02 |
| <i>matrin 3</i>                                                                                                                     | <i>MATR3</i>       | 200624_s_at | 1.63  | 0.00 |
| <i>methyl-CpG binding domain protein 2</i>                                                                                          | <i>MBD2</i>        | 202485_s_at | -2.53 | 0.00 |
| <i>multiple coagulation factor deficiency 2</i>                                                                                     | <i>MCFD2</i>       | 212245_at   | 1.47  | 0.05 |
| <i>malic enzyme 2, NAD(+)-dependent, mitochondrial</i>                                                                              | <i>ME2</i>         | 210154_at   | 1.91  | 0.01 |
| <i>MYST/Esa1-associated factor 6</i>                                                                                                | <i>MEAF6</i>       | 228517_at   | 1.64  | 0.00 |
| <i>mediator complex subunit 23</i>                                                                                                  | <i>MED23</i>       | 242706_s_at | 2.92  | 0.02 |
| <i>mediator complex subunit 6</i>                                                                                                   | <i>MED6</i>        | 207079_s_at | 1.59  | 0.01 |
| <i>mesenteric estrogen-dependent adipogenesis</i>                                                                                   | <i>MEDAG</i>       | 1565763_at  | -2.13 | 0.03 |
| <i>maternally expressed 3 (non-protein coding)</i>                                                                                  | <i>MEG3</i>        | 212732_at   | -2.59 | 0.00 |
| <i>meteorin, glial cell differentiation regulator</i>                                                                               | <i>METRIN</i>      | 219051_x_at | -1.82 | 0.03 |
| <i>methyltransferase like 10</i>                                                                                                    | <i>METTL10</i>     | 226634_at   | 1.41  | 0.05 |
| <i>methyltransferase like 12</i>                                                                                                    | <i>METTL12</i>     | 238680_at   | 2.74  | 0.01 |
| <i>methyltransferase like 15</i>                                                                                                    | <i>METTL15</i>     | 242247_at   | 2.14  | 0.00 |
| <i>methyltransferase like 7A</i>                                                                                                    | <i>METTL7A</i>     | 244376_at   | 1.81  | 0.03 |
| <i>methyltransferase like 7B</i>                                                                                                    | <i>METTL7B</i>     | 227055_at   | 4.86  | 0.00 |
| <i>major facilitator superfamily domain containing 10</i>                                                                           | <i>MFS10</i>       | 209215_at   | -1.45 | 0.00 |
| <i>maltase-glucoamylase (alpha-glucosidase)</i>                                                                                     | <i>MGAM</i>        | 206522_at   | 1.57  | 0.00 |
| <i>monoglyceride lipase</i>                                                                                                         | <i>MGLL</i>        | 225102_at   | -1.86 | 0.00 |
| <i>midnolin</i>                                                                                                                     | <i>MIDN</i>        | 225954_s_at | 1.47  | 0.03 |
| <i>MYC induced nuclear antigen</i>                                                                                                  | <i>MINA</i>        | 229675_at   | 3.11  | 0.02 |
| <i>myeloid leukemia factor 2</i>                                                                                                    | <i>MLF2</i>        | 200948_at   | -1.41 | 0.05 |
| <i>myeloid/lymphoid or mixed-lineage leukemia (trithorax homolog, Drosophila); translocated to, 10</i>                              | <i>MLL10</i>       | 205408_at   | -1.58 | 0.00 |
| <i>matrix metalloproteinase 28</i>                                                                                                  | <i>MMP28</i>       | 219909_at   | 2.88  | 0.02 |
| <i>M-phase phosphoprotein 9</i>                                                                                                     | <i>MPHOSPH9</i>    | 221965_at   | 1.41  | 0.03 |

|                                                                          |                     |              |       |      |
|--------------------------------------------------------------------------|---------------------|--------------|-------|------|
| <i>membrane protein, palmitoylated 5 (MAGUK p55 subfamily member 5)</i>  | <i>MPP5</i>         | 226092_at    | 1.57  | 0.01 |
| <i>myelin protein zero-like 2</i>                                        | <i>MPZL2</i>        | 203780_at    | 1.82  | 0.04 |
| <i>myelin protein zero-like 3</i>                                        | <i>MPZL3</i>        | 227747_at    | 1.39  | 0.05 |
| <i>mitochondrial ribosomal protein L20</i>                               | <i>MRPL20</i>       | 224803_s_at  | 2.38  | 0.02 |
| <i>membrane-spanning 4-domains, subfamily A, member 6A</i>               | <i>MS4A6A</i>       | 219666_at    | 1.49  | 0.00 |
| <i>metadherin</i>                                                        | <i>MTDH</i>         | 212251_at    | -1.38 | 0.00 |
| <i>myotubularin related protein 1</i>                                    | <i>MTMR1</i>        | 216095_x_at  | 1.25  | 0.02 |
| <i>myotubularin related protein 4</i>                                    | <i>MTMR4</i>        | 214268_s_at  | 1.24  | 0.01 |
| <i>myotubularin related protein 9</i>                                    | <i>MTMR9</i>        | 233101_at    | 1.46  | 0.04 |
| <i>mitochondrial tRNA translation optimization 1</i>                     | <i>MTO1</i>         | 224430_s_at  | 1.42  | 0.01 |
| <i>mechanistic target of rapamycin (serine/threonine kinase)</i>         | <i>MTOR</i>         | 202288_at    | 1.46  | 0.01 |
| <i>metastasis suppressor 1-like</i>                                      | <i>MTSS1L</i>       | 213978_at    | -2.39 | 0.01 |
| <i>metaxin 1</i>                                                         | <i>MTX1</i>         | 210386_s_at  | -1.68 | 0.00 |
| <i>myeloma overexpressed 2</i>                                           | <i>MYEOV2</i>       | 226845_s_at  | -1.46 | 0.01 |
| <i>myosin IG</i>                                                         | <i>MYO1G</i>        | 244654_at    | -1.30 | 0.00 |
| <i>mitotic spindle organizing protein 1</i>                              | <i>MZT1</i>         | 228530_at    | 1.71  | 0.03 |
| <i>NAALADL2 antisense RNA 3</i>                                          | <i>NAALADL2-AS3</i> | 241587_at    | -2.64 | 0.01 |
| <i>nuclear apoptosis inducing factor 1</i>                               | <i>NAIF1</i>        | 1554664_at   | 3.68  | 0.02 |
| <i>N-acetyltransferase 6 (GCN5-related)</i>                              | <i>NAT6</i>         | 210874_s_at  | -1.59 | 0.04 |
| <i>nicalin</i>                                                           | <i>NCLN</i>         | 222206_s_at  | -1.78 | 0.00 |
| <i>nuclear receptor coactivator 3</i>                                    | <i>NCOA3</i>        | 209061_at    | 1.33  | 0.02 |
| <i>NADH dehydrogenase (ubiquinone) complex I, assembly factor 5</i>      | <i>NDUFAF5</i>      | 222894_x_at  | 1.50  | 0.00 |
| <i>NADH dehydrogenase (ubiquinone) 1 beta subcomplex, 5, 16kDa</i>       | <i>NDUFB5</i>       | 203621_at    | 1.51  | 0.01 |
| <i>NADH dehydrogenase (ubiquinone) 1 beta subcomplex, 6, 17kDa</i>       | <i>NDUFB6</i>       | 1559042_at   | 3.27  | 0.00 |
| <i>N-terminal EF-hand calcium binding protein 2</i>                      | <i>NECAB2</i>       | 215005_at    | -1.60 | 0.00 |
| <i>NME/NM23 family member 8</i>                                          | <i>NME8</i>         | 220384_at    | 1.88  | 0.02 |
| <i>neuronal PAS domain protein 2</i>                                     | <i>NPAS2</i>        | 205460_at    | -1.32 | 0.01 |
| <i>neuronal PAS domain protein 3</i>                                     | <i>NPAS3</i>        | 233865_at    | -3.83 | 0.03 |
| <i>nephronophthisis 3 (adolescent)</i>                                   | <i>NPHP3</i>        | 1553389_at   | 1.85  | 0.03 |
| <i>N-acetylneuraminase pyruvate lyase (dihydrodipicolinate synthase)</i> | <i>NPL</i>          | 243066_at    | 1.77  | 0.00 |
| <i>nuclear receptor subfamily 2, group E, member 1</i>                   | <i>NR2E1</i>        | 207443_at    | 7.04  | 0.04 |
| <i>neurogranin (protein kinase C substrate, RC3)</i>                     | <i>NRGN</i>         | 204081_at    | -2.30 | 0.02 |
| <i>neurotrophic tyrosine kinase, receptor, type 3</i>                    | <i>NTRK3</i>        | 206462_s_at  | -2.24 | 0.00 |
| <i>neurotensin</i>                                                       | <i>NTS</i>          | 206291_at    | -1.67 | 0.01 |
| <i>nucleotide binding protein 2</i>                                      | <i>NUBP2</i>        | 218227_at    | -1.69 | 0.01 |
| <i>nuclear mitotic apparatus protein 1</i>                               | <i>NUMA1</i>        | 1554663_a_at | -6.01 | 0.03 |
| <i>nucleoporin 107kDa</i>                                                | <i>NUP107</i>       | 218768_at    | 1.74  | 0.01 |

|                                                                                                     |                  |              |       |      |
|-----------------------------------------------------------------------------------------------------|------------------|--------------|-------|------|
| <i>nucleoporin 160kDa</i>                                                                           | <i>NUP160</i>    | 214962_s_at  | 1.75  | 0.01 |
| <i>occludin</i>                                                                                     | <i>OCN</i>       | 231022_at    | 7.26  | 0.01 |
| <i>O-linked N-acetylglucosamine (GlcNAc) transferase</i>                                            | <i>OGT</i>       | 207563_s_at  | 1.56  | 0.03 |
| <i>oncoprotein induced transcript 3</i>                                                             | <i>OIT3</i>      | 230478_at    | 3.05  | 0.00 |
| <i>olfactory receptor, family 4, subfamily D, member 1</i>                                          | <i>OR4D1</i>     | 1567069_at   | -2.15 | 0.01 |
| <i>olfactory receptor, family 51, subfamily B, member 2 (gene/pseudogene)</i>                       | <i>OR51B2</i>    | 234486_at    | -2.07 | 0.02 |
| <i>oxysterol binding protein</i>                                                                    | <i>OSBP</i>      | 1563051_at   | 1.52  | 0.02 |
| <i>oxysterol binding protein-like 9</i>                                                             | <i>OSBPL9</i>    | 218047_at    | 1.54  | 0.03 |
| <i>OSER1 antisense RNA 1 (head to head)</i>                                                         | <i>OSER1-AS1</i> | 1569745_at   | 1.47  | 0.04 |
| <i>oncostatin M receptor</i>                                                                        | <i>OSMR</i>      | 1554008_at   | 1.64  | 0.01 |
| <i>oligosaccharyltransferase complex subunit (non-catalytic)</i>                                    | <i>OSTC</i>      | 223001_at    | 1.45  | 0.02 |
| <i>peptidyl arginine deiminase, type II</i>                                                         | <i>PADI2</i>     | 1554385_a_at | 2.19  | 0.00 |
| <i>peptidyl arginine deiminase, type II</i>                                                         | <i>PADI2</i>     | 209791_at    | 1.71  | 0.03 |
| <i>peptidyl arginine deiminase, type IV</i>                                                         | <i>PADI4</i>     | 211413_s_at  | 2.80  | 0.04 |
| <i>pregnancy-associated plasma protein A, pappalysin 1</i>                                          | <i>PAPPA</i>     | 232748_at    | -1.35 | 0.01 |
| <i>par-3 family cell polarity regulator</i>                                                         | <i>PARD3</i>     | 210094_s_at  | -1.58 | 0.00 |
| <i>paired box 3</i>                                                                                 | <i>PAX3</i>      | 231666_at    | -2.68 | 0.01 |
| <i>PCBP1 antisense RNA 1</i>                                                                        | <i>PCBP1-AS1</i> | 235909_at    | 3.00  | 0.04 |
| <i>poly(rC) binding protein 2</i>                                                                   | <i>PCBP2</i>     | 213517_at    | -1.80 | 0.02 |
| <i>protocadherin 1</i>                                                                              | <i>PCDH1</i>     | 203918_at    | 3.49  | 0.01 |
| <i>protocadherin 10</i>                                                                             | <i>PCDH10</i>    | 1556329_a_at | -2.55 | 0.02 |
| <i>protocadherin gamma subfamily C, 3</i>                                                           | <i>PCDHGC3</i>   | 215836_s_at  | -2.40 | 0.01 |
| <i>pericentriolar material 1</i>                                                                    | <i>PCM1</i>      | 202174_s_at  | 1.30  | 0.00 |
| <i>pecanex-like 4 (Drosophila)</i>                                                                  | <i>PCNXL4</i>    | 219972_s_at  | 2.30  | 0.05 |
| <i>programmed cell death 4 (neoplastic transformation inhibitor)</i>                                | <i>PDCD4</i>     | 212593_s_at  | 1.29  | 0.03 |
| <i>phosphodiesterase 11A</i>                                                                        | <i>PDE11A</i>    | 237248_at    | -2.29 | 0.02 |
| <i>peroxisomal biogenesis factor 5-like</i>                                                         | <i>PEX5L</i>     | 241833_at    | -1.91 | 0.02 |
| <i>phosphoglycerate kinase 1</i>                                                                    | <i>PGK1</i>      | 217383_at    | 1.78  | 0.04 |
| <i>putative homeodomain transcription factor 1</i>                                                  | <i>PHTF1</i>     | 210191_s_at  | 3.52  | 0.01 |
| <i>peptidase inhibitor 15</i>                                                                       | <i>PI15</i>      | 207938_at    | -3.01 | 0.01 |
| <i>phosphatidylinositol 4-kinase, catalytic, beta</i>                                               | <i>PI4KB</i>     | 206138_s_at  | -1.21 | 0.01 |
| <i>protein inhibitor of activated STAT, 2</i>                                                       | <i>PIAS2</i>     | 37433_at     | 1.40  | 0.04 |
| <i>phosphatidylinositol binding clathrin assembly protein</i>                                       | <i>PICALM</i>    | 203134_at    | 2.20  | 0.00 |
| <i>phospholipase B domain containing 1</i>                                                          | <i>PLBD1</i>     | 222639_s_at  | 2.34  | 0.00 |
| <i>pleckstrin homology domain containing, family A (phosphoinositide binding specific) member 2</i> | <i>PLEKHA2</i>   | 217677_at    | 1.65  | 0.03 |
| <i>plastin 3</i>                                                                                    | <i>PLS3</i>      | 201215_at    | 5.03  | 0.04 |
| <i>polymerase (RNA) II (DNA directed) polypeptide J4, pseudogene</i>                                | <i>POLR2J4</i>   | 222208_s_at  | 1.52  | 0.04 |
| <i>pyrophosphatase (inorganic) 2</i>                                                                | <i>PPA2</i>      | 1554499_s_at | 2.83  | 0.04 |



|                                                                   |                 |              |       |      |
|-------------------------------------------------------------------|-----------------|--------------|-------|------|
| <i>pyrophosphatase (inorganic) 2</i>                              | <i>PPA2</i>     | 1556285_s_at | 1.63  | 0.00 |
| <i>phosphopantothenoylcysteine synthetase</i>                     | <i>PPCS</i>     | 218341_at    | 1.83  | 0.00 |
| <i>peptidylprolyl isomerase G (cyclophilin G)</i>                 | <i>PPIG</i>     | 208993_s_at  | 1.47  | 0.00 |
| <i>protein phosphatase 1, regulatory subunit 12A</i>              | <i>PPP1R12A</i> | 201602_s_at  | 1.28  | 0.02 |
| <i>protein phosphatase 2, regulatory subunit B', gamma</i>        | <i>PPP2R5C</i>  | 1554365_a_at | 1.69  | 0.00 |
| <i>PR domain containing 6</i>                                     | <i>PRDM6</i>    | 230311_s_at  | -1.68 | 0.03 |
| <i>prolactin receptor</i>                                         | <i>PRLR</i>     | 206346_at    | -2.14 | 0.03 |
| <i>pre-mRNA processing factor 18</i>                              | <i>PRPF18</i>   | 221547_at    | 1.55  | 0.02 |
| <i>pre-mRNA processing factor 38A</i>                             | <i>PRPF38A</i>  | 223230_at    | 1.30  | 0.00 |
| <i>proline rich 7 (synaptic)</i>                                  | <i>PRR7</i>     | 219742_at    | -2.90 | 0.00 |
| <i>proteasome (prosome, macropain) subunit, alpha type, 1</i>     | <i>PSMA1</i>    | 211746_x_at  | 1.34  | 0.02 |
| <i>proteasome (prosome, macropain) subunit, alpha type, 1</i>     | <i>PSMA1</i>    | 210759_s_at  | 1.49  | 0.00 |
| <i>proteasome (prosome, macropain) subunit, beta type, 7</i>      | <i>PSMB7</i>    | 244801_at    | 1.38  | 0.03 |
| <i>proteasome (prosome, macropain) 26S subunit, non-ATPase, 6</i> | <i>PSMD6</i>    | 202753_at    | 1.21  | 0.01 |
| <i>polypyrimidine tract binding protein 1</i>                     | <i>PTBP1</i>    | 211270_x_at  | -1.30 | 0.04 |
| <i>pre T-cell antigen receptor alpha</i>                          | <i>PTCRA</i>    | 211252_x_at  | -1.63 | 0.04 |
| <i>protein tyrosine phosphatase, receptor type, S</i>             | <i>PTPRS</i>    | 210823_s_at  | -2.05 | 0.03 |
| <i>poliovirus receptor</i>                                        | <i>PVR</i>      | 216283_s_at  | -2.24 | 0.03 |
| <i>peptide YY</i>                                                 | <i>PYY</i>      | 211253_x_at  | 3.00  | 0.02 |
| <i>quiescin Q6 sulfhydryl oxidase 2</i>                           | <i>QSOX2</i>    | 235239_at    | -1.57 | 0.00 |
| <i>queuine tRNA-ribosyltransferase domain containing 1</i>        | <i>QTRTD1</i>   | 219178_at    | 1.25  | 0.01 |
| <i>RAB21, member RAS oncogene family</i>                          | <i>RAB21</i>    | 239329_at    | 1.48  | 0.01 |
| <i>RAB3 GTPase activating protein subunit 2 (non-catalytic)</i>   | <i>RAB3GAP2</i> | 202373_s_at  | 1.57  | 0.00 |
| <i>RAB9B, member RAS oncogene family pseudogene 1</i>             | <i>RAB9BP1</i>  | 208245_at    | -1.46 | 0.01 |
| <i>RAB, member RAS oncogene family-like 6</i>                     | <i>RABL6</i>    | 223166_x_at  | -1.30 | 0.03 |
| <i>RAD23 homolog B (S. cerevisiae)</i>                            | <i>RAD23B</i>   | 223598_at    | 1.39  | 0.00 |
| <i>Ral GTPase activating protein, alpha subunit 1 (catalytic)</i> | <i>RALGAPA1</i> | 214855_s_at  | 2.24  | 0.00 |
| <i>RAN binding protein 2</i>                                      | <i>RANBP2</i>   | 201713_s_at  | 1.37  | 0.00 |
| <i>RAP1, GTP-GDP dissociation stimulator 1</i>                    | <i>RAP1GDS1</i> | 237856_at    | 4.29  | 0.00 |
| <i>RAP2A, member of RAS oncogene family</i>                       | <i>RAP2A</i>    | 1556808_at   | 4.29  | 0.00 |
| <i>arginyl-tRNA synthetase 2, mitochondrial</i>                   | <i>RARS2</i>    | 232901_at    | 2.45  | 0.02 |
| <i>Ras protein-specific guanine nucleotide-releasing factor 1</i> | <i>RASGRF1</i>  | 214905_at    | 1.89  | 0.02 |
| <i>Ras association (RalGDS/AF-6) domain family member 1</i>       | <i>RASSF1</i>   | 204346_s_at  | -1.41 | 0.02 |
| <i>RanBP-type and C3HC4-type zinc finger containing 1</i>         | <i>RBCK1</i>    | 207713_s_at  | -1.56 | 0.02 |
| <i>RNA binding protein, fox-1 homolog (C. elegans) 3</i>          | <i>RBFOX3</i>   | 229406_at    | -2.59 | 0.00 |
| <i>RNA binding motif protein 17</i>                               | <i>RBM17</i>    | 224780_at    | 1.56  | 0.02 |

|                                                                                                                           |                |              |       |      |
|---------------------------------------------------------------------------------------------------------------------------|----------------|--------------|-------|------|
| <i>RNA binding motif protein 25</i>                                                                                       | <i>RBM25</i>   | 1557081_at   | 1.56  | 0.00 |
| <i>RNA binding motif, single stranded interacting protein 2</i>                                                           | <i>RBMS2</i>   | 235439_at    | -3.03 | 0.01 |
| <i>RNA binding motif protein, Y-linked, family 2, member F pseudogene</i>                                                 | <i>RBM2FP</i>  | 216544_at    | -1.18 | 0.05 |
| <i>RNA binding motif protein, Y-linked, family 3, member A pseudogene</i>                                                 | <i>RBM3AP</i>  | 1565320_at   | -2.17 | 0.04 |
| <i>retinol dehydrogenase 13 (all-trans/9-cis) ring finger and FYVE-like domain containing E3 ubiquitin protein ligase</i> | <i>RDH13</i>   | 227360_at    | -1.83 | 0.00 |
| <i>regulatory factor X, 1 (influences HLA class II expression)</i>                                                        | <i>RFFL</i>    | 1552651_a_at | -1.39 | 0.04 |
| <i>regulatory factor X, 1 (influences HLA class II expression)</i>                                                        | <i>RFX1</i>    | 226786_at    | -1.41 | 0.01 |
| <i>regulatory factor X, 1 (influences HLA class II expression)</i>                                                        | <i>RFX1</i>    | 206321_at    | 1.72  | 0.04 |
| <i>regulatory factor X, 3 (influences HLA class II expression)</i>                                                        | <i>RFX3</i>    | 238810_at    | 2.92  | 0.05 |
| <i>regulator of G-protein signaling 2</i>                                                                                 | <i>RGS2</i>    | 202388_at    | 1.49  | 0.01 |
| <i>regulator of G-protein signaling 3</i>                                                                                 | <i>RGS3</i>    | 203823_at    | -1.36 | 0.01 |
| <i>ras homolog family member H</i>                                                                                        | <i>RHOH</i>    | 236293_at    | 1.64  | 0.04 |
| <i>RIC8 guanine nucleotide exchange factor B</i>                                                                          | <i>RIC8B</i>   | 229637_at    | 1.84  | 0.00 |
| <i>Rab interacting lysosomal protein ring finger protein 144B</i>                                                         | <i>RILP</i>    | 227366_at    | -1.41 | 0.04 |
| <i>ring finger protein 145</i>                                                                                            | <i>RNF144B</i> | 239012_at    | 3.16  | 0.03 |
| <i>ring finger protein 145</i>                                                                                            | <i>RNF145</i>  | 238949_at    | -3.46 | 0.00 |
| <i>ring finger protein 187</i>                                                                                            | <i>RNF187</i>  | 228470_at    | -2.92 | 0.03 |
| <i>rhopilin associated tail protein 1</i>                                                                                 | <i>ROPN1</i>   | 224191_x_at  | 1.64  | 0.01 |
| <i>RPA interacting protein</i>                                                                                            | <i>RPAIN</i>   | 228288_at    | 2.00  | 0.00 |
| <i>ribosomal protein L26-like 1</i>                                                                                       | <i>RPL26L1</i> | 218830_at    | 1.39  | 0.00 |
| <i>ribosomal protein L7-like 1</i>                                                                                        | <i>RPL7L1</i>  | 224738_x_at  | 1.38  | 0.01 |
| <i>ribosomal protein L9</i>                                                                                               | <i>RPL9</i>    | 200032_s_at  | 1.23  | 0.00 |
| <i>regulation of nuclear pre-mRNA domain containing 1A</i>                                                                | <i>RPRD1A</i>  | 222558_at    | 1.94  | 0.04 |
| <i>ribosome binding protein 1</i>                                                                                         | <i>RRBP1</i>   | 213495_s_at  | -1.30 | 0.04 |
| <i>RNA 3'-terminal phosphate cyclase reticulon 2</i>                                                                      | <i>RTCA</i>    | 215351_at    | 1.74  | 0.03 |
| <i>RTN2</i>                                                                                                               | <i>RTN2</i>    | 34408_at     | -1.60 | 0.00 |
| <i>RUN and FYVE domain containing 3</i>                                                                                   | <i>RUFY3</i>   | 213430_at    | 1.57  | 0.00 |
| <i>RWD domain containing 1</i>                                                                                            | <i>RWDD1</i>   | 240214_at    | 2.75  | 0.03 |
| <i>S100 calcium binding protein A2</i>                                                                                    | <i>S100A2</i>  | 204268_at    | 2.88  | 0.02 |
| <i>sterile alpha motif domain containing 14</i>                                                                           | <i>SAMD14</i>  | 213866_at    | -1.84 | 0.01 |
| <i>secretory carrier membrane protein 1</i>                                                                               | <i>SCAMP1</i>  | 212417_at    | -1.83 | 0.01 |
| <i>secretory carrier membrane protein 1</i>                                                                               | <i>SCAMP1</i>  | 206667_s_at  | 2.61  | 0.02 |
| <i>scavenger receptor class B, member 2</i>                                                                               | <i>SCARB2</i>  | 215754_at    | -1.46 | 0.04 |
| <i>sec1 family domain containing 1</i>                                                                                    | <i>SCFD1</i>   | 215548_s_at  | 1.31  | 0.04 |
| <i>sodium channel and clathrin linker 1</i>                                                                               | <i>SCLT1</i>   | 1569495_at   | -2.40 | 0.01 |
| <i>SEC16 homolog B (S. cerevisiae)</i>                                                                                    | <i>SEC16B</i>  | 239618_at    | 1.67  | 0.02 |
| <i>SEC22 vesicle trafficking protein homolog C (S. cerevisiae)</i>                                                        | <i>SEC22C</i>  | 235120_at    | -1.67 | 0.00 |
| <i>SEC23 interacting protein</i>                                                                                          | <i>SEC23IP</i> | 209175_at    | 1.64  | 0.02 |
| <i>selenoprotein O</i>                                                                                                    | <i>SELO</i>    | 233168_s_at  | -1.46 | 0.04 |
| <i>SUMO1/sentrin/SMT3 specific peptidase</i>                                                                              | <i>SEN2</i>    | 228380_at    | 1.47  | 0.00 |

|                                                                                             |           |             |       |      |
|---------------------------------------------------------------------------------------------|-----------|-------------|-------|------|
| <i>selenoprotein P, plasma, 1</i>                                                           | SEPP1     | 201427_s_at | 4.24  | 0.04 |
| <i>stress-associated endoplasmic reticulum protein 1</i>                                    | SERP1     | 235475_at   | 3.05  | 0.00 |
| <i>serpin peptidase inhibitor, clade A (alpha-1 antiproteinase, antitrypsin), member 1</i>  | SERPINA1  | 211429_s_at | -1.14 | 0.03 |
| <i>serpin peptidase inhibitor, clade A (alpha-1 antiproteinase, antitrypsin), member 12</i> | SERPINA12 | 1552544_at  | 3.52  | 0.03 |
| <i>serpin peptidase inhibitor, clade B (ovalbumin), member 9</i>                            | SERPINB9  | 209723_at   | 1.22  | 0.03 |
| <i>splicing factor 3b, subunit 4, 49kDa</i>                                                 | SF3B4     | 209044_x_at | -1.28 | 0.04 |
| <i>SH3-domain GRB2-like endophilin B2</i>                                                   | SH3GLB2   | 224432_at   | -1.80 | 0.02 |
| <i>SH3 and PX domains 2B</i>                                                                | SH3PXD2B  | 231823_s_at | 1.52  | 0.02 |
| <i>SHC (Src homology 2 domain containing) transforming protein 1 pseudogene 1</i>           | SHC1P1    | 217048_at   | -2.38 | 0.04 |
| <i>sialic acid binding Ig-like lectin 17, pseudogene</i>                                    | SIGLEC17P | 232686_at   | 1.63  | 0.04 |
| <i>SKI-like proto-oncogene</i>                                                              | SKIL      | 232379_at   | 2.74  | 0.04 |
| <i>solute carrier family 12 (potassium/chloride transporter), member 6</i>                  | SLC12A6   | 223596_at   | -1.29 | 0.00 |
| <i>solute carrier family 22 (organic anion transporter), member 7</i>                       | SLC22A7   | 221661_at   | 2.37  | 0.00 |
| <i>solute carrier family 25 (mitochondrial carnitine/acylcarnitine carrier), member 29</i>  | SLC25A29  | 225306_s_at | -1.73 | 0.01 |
| <i>solute carrier family 25, member 51</i>                                                  | SLC25A51  | 232092_at   | -1.52 | 0.00 |
| <i>solute carrier family 2 (facilitated glucose transporter), member 8</i>                  | SLC2A8    | 218985_at   | -1.30 | 0.02 |
| <i>solute carrier family 2 (facilitated glucose transporter), member 8</i>                  | SLC2A8    | 239426_at   | -1.84 | 0.01 |
| <i>solute carrier family 39 (zinc transporter), member 2</i>                                | SLC39A2   | 220413_at   | 2.11  | 0.01 |
| <i>solute carrier family 43 (amino acid system L transporter), member 2</i>                 | SLC43A2   | 228918_at   | -1.47 | 0.00 |
| <i>solute carrier family 44, member 5</i>                                                   | SLC44A5   | 1569112_at  | 1.66  | 0.05 |
| <i>solute carrier family 7 (cationic amino acid transporter, y+ system), member 1</i>       | SLC7A1    | 206566_at   | 2.12  | 0.04 |
| <i>solute carrier family 9, subfamily A (NHE9, cation proton antiporter 9), member 9</i>    | SLC9A9    | 242587_at   | 3.25  | 0.03 |
| <i>small leucine-rich protein 1</i>                                                         | SMLR1     | 230716_at   | -1.88 | 0.05 |
| <i>small nucleolar RNA host gene 12 (non-protein coding)</i>                                | SNHG12    | 223774_at   | 1.52  | 0.03 |
| <i>small nucleolar RNA, H/ACA box 65</i>                                                    | SNORA65   | 1558081_at  | 2.92  | 0.00 |
| <i>sorting nexin 1</i>                                                                      | SNX1      | 213364_s_at | 1.82  | 0.03 |
| <i>sorting nexin 13</i>                                                                     | SNX13     | 215820_x_at | 2.38  | 0.02 |
| <i>SON DNA binding protein</i>                                                              | SON       | 201086_x_at | 1.47  | 0.00 |
| <i>son of sevenless homolog 1 (Drosophila)</i>                                              | SOS1      | 212777_at   | 1.49  | 0.02 |
| <i>SRY (sex determining region Y)-box 30</i>                                                | SOX30     | 207678_s_at | 3.60  | 0.00 |
| <i>spastic paraplegia 21 (autosomal recessive, Mast syndrome)</i>                           | SPG21     | 215383_x_at | -2.13 | 0.00 |

|                                                                                     |                |                                     |       |      |
|-------------------------------------------------------------------------------------|----------------|-------------------------------------|-------|------|
| <i>small proline-rich protein 1A</i>                                                | SPRR1A         | 214549_x_at                         | -1.32 | 0.01 |
| <i>splicing regulatory glutamine/lysine-rich protein 1</i>                          | SREK1          | 1568783_at                          | 2.75  | 0.04 |
| <i>serine/arginine-rich splicing factor 11</i>                                      | SRSF11         | 236948_x_at                         | 3.42  | 0.03 |
| <i>serine/arginine-rich splicing factor 3</i>                                       | SRSF3          | 232392_at                           | 2.29  | 0.01 |
| <i>single-stranded DNA binding protein 1, mitochondrial</i>                         | SSBP1          | 214060_at                           | 2.15  | 0.00 |
| <i>StAR-related lipid transfer (START) domain containing 5</i>                      | STARD5         | 213820_s_at                         | 1.26  | 0.04 |
| <i>signal transducer and activator of transcription 1, 91kDa</i>                    | STAT1          | AFFX-<br>HUMISGF3A/M9<br>7935_MB_at | 1.48  | 0.03 |
| <i>stromal interaction molecule 1</i>                                               | STIM1          | 1557477_at                          | -1.50 | 0.00 |
| <i>striatin, calmodulin binding protein</i>                                         | STRN           | 236388_at                           | 1.75  | 0.00 |
| <i>SUCLA2 antisense RNA 1</i>                                                       | SUCLA2-<br>AS1 | 1569859_at                          | -1.55 | 0.04 |
| <i>sulfatase modifying factor 1</i>                                                 | SUMF1          | 226850_at                           | 1.29  | 0.00 |
| <i>SV2 related protein homolog (rat)</i>                                            | SVOP           | 1568625_at                          | -2.57 | 0.01 |
| <i>synaptojanin 2 binding protein</i>                                               | SYNJ2BP        | 227274_at                           | 1.61  | 0.02 |
| <i>TATA box binding protein (TBP)-associated factor, RNA polymerase I, D, 41kDa</i> | TAF1D          | 221580_s_at                         | 1.25  | 0.02 |
| <i>TAO kinase 2</i>                                                                 | TAOK2          | 204986_s_at                         | -1.84 | 0.00 |
| <i>TAR DNA binding protein</i>                                                      | TARDBP         | 200020_at                           | 1.11  | 0.02 |
| <i>threonyl-tRNA synthetase</i>                                                     | TARS           | 201263_at                           | 1.41  | 0.00 |
| <i>taste receptor, type 2, member 9</i>                                             | TAS2R9         | 221461_at                           | -2.13 | 0.01 |
| <i>tyrosine aminotransferase</i>                                                    | TAT            | 206916_x_at                         | -1.67 | 0.00 |
| <i>TBC1 domain family, member 20</i>                                                | TBC1D20        | 226409_at                           | 1.54  | 0.04 |
| <i>TBC1 domain family, member 25</i>                                                | TBC1D25        | 227820_at                           | -1.45 | 0.00 |
| <i>T-box 2</i>                                                                      | TBX2           | 40560_at                            | -1.63 | 0.02 |
| <i>TRPM8 channel-associated factor 1</i>                                            | TCAF1          | 212981_s_at                         | 2.21  | 0.03 |
| <i>transcription factor 3</i>                                                       | TCF3           | 209151_x_at                         | 3.01  | 0.02 |
| <i>telomerase reverse transcriptase</i>                                             | TERT           | 207199_at                           | -1.64 | 0.00 |
| <i>transforming growth factor, beta 2</i>                                           | TGFB2          | 220406_at                           | 3.31  | 0.03 |
| <i>thrombomodulin</i>                                                               | THBD           | 203888_at                           | 2.19  | 0.02 |
| <i>thioesterase superfamily member 5</i>                                            | THEM5          | 1562490_at                          | -2.66 | 0.01 |
| <i>thyroid hormone receptor, alpha</i>                                              | THRA           | 1316_at                             | -1.52 | 0.02 |
| <i>thrombospondin, type I, domain containing 7A</i>                                 | THSD7A         | 230008_at                           | -2.33 | 0.00 |
| <i>translocase of inner mitochondrial membrane 21 homolog (yeast)</i>               | TIMM21         | 223181_at                           | 1.86  | 0.00 |
| <i>TOR signaling pathway regulator</i>                                              | TIPRL          | 214773_x_at                         | -1.88 | 0.04 |
| <i>tight junction protein 2</i>                                                     | TJP2           | 237132_at                           | -2.26 | 0.02 |
| <i>tousled-like kinase 1</i>                                                        | TLK1           | 241642_x_at                         | -1.91 | 0.04 |
| <i>toll-like receptor 1</i>                                                         | TLR1           | 210176_at                           | 1.42  | 0.00 |
| <i>toll-like receptor 6</i>                                                         | TLR6           | 207446_at                           | 1.99  | 0.03 |
| <i>transmembrane 6 superfamily member 1</i>                                         | TM6SF1         | 219892_at                           | 2.10  | 0.03 |
| <i>transmembrane and coiled-coil domain family 1</i>                                | TMCC1          | 213351_s_at                         | -1.59 | 0.00 |
| <i>transmembrane emp24 protein transport</i>                                        | TMED4          | 1558053_s_at                        | -2.05 | 0.00 |

|                                                                       |                 |              |       |      |
|-----------------------------------------------------------------------|-----------------|--------------|-------|------|
| <i>domain containing 4</i>                                            |                 |              |       |      |
| <i>transmembrane protein 105</i>                                      | <i>TMEM105</i>  | 1561243_at   | -2.88 | 0.00 |
| <i>transmembrane protein 131</i>                                      | <i>TMEM131</i>  | 235972_at    | -1.88 | 0.00 |
| <i>transmembrane protein 218</i>                                      | <i>TMEM218</i>  | 235654_at    | 2.52  | 0.00 |
| <i>transmembrane protein 259</i>                                      | <i>TMEM259</i>  | 213985_s_at  | 4.19  | 0.02 |
| <i>transmembrane protein 88</i>                                       | <i>TMEM88</i>   | 229452_at    | -1.24 | 0.03 |
| <i>transmembrane protein 95</i>                                       | <i>TMEM95</i>   | 1560281_a_at | -1.67 | 0.02 |
| <i>thymopoietin</i>                                                   | <i>TMPO</i>     | 237863_at    | 2.09  | 0.03 |
| <i>thioredoxin-related transmembrane protein 4</i>                    | <i>TMX4</i>     | 201581_at    | 1.54  | 0.01 |
| <i>tumor necrosis factor (ligand) superfamily, member 13</i>          | <i>TNFSF13</i>  | 209499_x_at  | 1.42  | 0.00 |
| <i>tumor necrosis factor (ligand) superfamily, member 13</i>          | <i>TNFSF13</i>  | 211495_x_at  | 1.61  | 0.00 |
| <i>translocase of outer mitochondrial membrane 20 homolog (yeast)</i> | <i>TOMM20</i>   | 200662_s_at  | 1.45  | 0.02 |
| <i>torsin A interacting protein 2</i>                                 | <i>TOR1AIP2</i> | 1569676_at   | 1.96  | 0.02 |
| <i>torsin A interacting protein 2</i>                                 | <i>TOR1AIP2</i> | 235453_at    | 3.40  | 0.00 |
| <i>tumor protein p53 binding protein 2</i>                            | <i>TP53BP2</i>  | 203120_at    | 1.55  | 0.04 |
| <i>tubulin polyglutamylase complex subunit 2</i>                      | <i>TPGS2</i>    | 244233_at    | 1.53  | 0.01 |
| <i>taperin</i>                                                        | <i>TPRN</i>     | 225891_at    | -1.65 | 0.01 |
| <i>transformer 2 beta homolog (Drosophila)</i>                        | <i>TRA2B</i>    | 200893_at    | 1.34  | 0.00 |
| <i>TraB domain containing 2B</i>                                      | <i>TRABD2B</i>  | 244472_at    | -2.13 | 0.03 |
| <i>trafficking protein particle complex 2-like</i>                    | <i>TRAPPC2L</i> | 238628_s_at  | -1.75 | 0.01 |
| <i>trafficking protein particle complex 6B</i>                        | <i>TRAPPC6B</i> | 225537_at    | 1.83  | 0.02 |
| <i>tripartite motif containing 38</i>                                 | <i>TRIM38</i>   | 235084_x_at  | -1.53 | 0.01 |
| <i>tripartite motif containing 4</i>                                  | <i>TRIM4</i>    | 224159_x_at  | -1.39 | 0.00 |
| <i>transformation/transcription domain-associated protein</i>         | <i>TRRAP</i>    | 214908_s_at  | 2.68  | 0.01 |
| <i>tetraspanin 7</i>                                                  | <i>TSPAN7</i>   | 202242_at    | -1.25 | 0.04 |
| <i>TSPY-like 1</i>                                                    | <i>TSPYL1</i>   | 1560647_at   | 1.87  | 0.03 |
| <i>tubulin, gamma complex associated protein 5</i>                    | <i>TUBGCP5</i>  | 227967_at    | 1.60  | 0.02 |
| <i>taurine up-regulated 1 (non-protein coding)</i>                    | <i>TUG1</i>     | 228397_at    | 2.25  | 0.04 |
| <i>tumor suppressor candidate 7 (non-protein coding)</i>              | <i>TUSC7</i>    | 1558602_a_at | -3.52 | 0.00 |
| <i>taxilin gamma</i>                                                  | <i>TXLNG</i>    | 1557954_at   | 1.99  | 0.00 |
| <i>UBA-like domain containing 2</i>                                   | <i>UBALD2</i>   | 224785_at    | -1.60 | 0.00 |
| <i>ubiquitin-like domain containing CTD phosphatase 1</i>             | <i>UBLCP1</i>   | 227413_at    | 1.66  | 0.00 |
| <i>ubiuuclein 2</i>                                                   | <i>UBN2</i>     | 238349_at    | -1.73 | 0.00 |
| <i>ubiuuclein 2</i>                                                   | <i>UBN2</i>     | 238350_at    | -1.56 | 0.00 |
| <i>ubiquilin 2</i>                                                    | <i>UBQLN2</i>   | 215884_s_at  | 1.55  | 0.00 |
| <i>ubiquitin carboxyl-terminal hydrolase L5</i>                       | <i>UCHL5</i>    | 219960_s_at  | 1.87  | 0.00 |
| <i>UPF3 regulator of nonsense transcripts homolog A (yeast)</i>       | <i>UPF3A</i>    | 206959_s_at  | 1.32  | 0.00 |
| <i>uroplakin 1B</i>                                                   | <i>UPK1B</i>    | 210064_s_at  | 2.00  | 0.00 |
| <i>ubiquinol-cytochrome c reductase</i>                               | <i>UQCC1</i>    | 229672_at    | 1.99  | 0.01 |

|                                                                                    |               |              |       |      |
|------------------------------------------------------------------------------------|---------------|--------------|-------|------|
| <i>complex assembly factor 1</i>                                                   |               |              |       |      |
| <i>ubiquitin specific peptidase 12</i>                                             | USP12         | 215886_x_at  | -2.02 | 0.00 |
| <i>ubiquitin specific peptidase 16</i>                                             | USP16         | 228822_s_at  | 1.35  | 0.02 |
| <i>ubiquitin specific peptidase 27, X-linked</i>                                   | USP27X        | 217605_at    | -1.62 | 0.02 |
| <i>ubiquitin specific peptidase 34</i>                                             | USP34         | 242647_at    | 1.62  | 0.01 |
| <i>ubiquitin specific peptidase 8</i>                                              | USP8          | 229501_s_at  | 1.21  | 0.02 |
| <i>urotensin 2 receptor</i>                                                        | UTS2R         | 1553262_a_at | -1.94 | 0.01 |
| <i>vesicle-associated membrane protein 5</i>                                       | VAMP5         | 214115_at    | -1.40 | 0.00 |
| <i>VAMP (vesicle-associated membrane protein)-associated protein A, 33kDa</i>      | VAPA          | 225198_at    | 1.79  | 0.01 |
| <i>valyl-tRNA synthetase 2, mitochondrial</i>                                      | VARS2         | 226200_at    | -2.24 | 0.00 |
| <i>voltage-dependent anion channel 3</i>                                           | VDAC3         | 208846_s_at  | 1.37  | 0.04 |
| <i>vezatin, adherens junctions transmembrane protein</i>                           | VEZT          | 223090_x_at  | 1.65  | 0.01 |
| <i>vanin 3</i>                                                                     | VNN3          | 220528_at    | 1.60  | 0.02 |
| <i>WDFY family member 4</i>                                                        | WDFY4         | 229597_s_at  | -1.32 | 0.00 |
| <i>WAS protein homolog associated with actin, golgi membranes and microtubules</i> | WHAMM         | 228953_at    | 1.37  | 0.03 |
| <i>WAS/WASL interacting protein family, member 3</i>                               | WIPF3         | 232389_at    | -1.44 | 0.00 |
| <i>widely interspaced zinc finger motifs</i>                                       | WIZ           | 221785_at    | 3.63  | 0.00 |
| <i>WW and C2 domain containing 1</i>                                               | WWC1          | 236725_at    | -3.07 | 0.04 |
| <i>WW domain containing E3 ubiquitin protein ligase 2</i>                          | WWP2          | 1552737_s_at | 1.69  | 0.00 |
| <i>X antigen family, member 1E</i>                                                 | XAGE1B/XAGE1E | 220057_at    | -1.90 | 0.03 |
| <i>X-prolyl aminopeptidase 3, mitochondrial</i>                                    | XPNPEP3       | 227910_at    | 2.66  | 0.00 |
| <i>X-ray repair complementing defective repair in Chinese hamster cells 4</i>      | XRCC4         | 205071_x_at  | 2.54  | 0.00 |
| <i>X-ray repair complementing defective repair in Chinese hamster cells 4</i>      | XRCC4         | 210813_s_at  | 1.76  | 0.00 |
| <i>5'-3' exoribonuclease 2</i>                                                     | XRN2          | 233878_s_at  | 1.93  | 0.00 |
| <i>Yae1 domain containing 1</i>                                                    | YAE1D1        | 223433_at    | 1.83  | 0.00 |
| <i>Yes-associated protein 1</i>                                                    | YAP1          | 224894_at    | 2.20  | 0.00 |
| <i>YTH domain containing 2</i>                                                     | YTHDC2        | 205835_s_at  | 2.25  | 0.00 |
| <i>YY1 transcription factor</i>                                                    | YY1           | 201901_s_at  | -1.44 | 0.00 |
| <i>YY1 transcription factor</i>                                                    | YY1           | 213494_s_at  | -1.38 | 0.00 |
| <i>zinc finger and BTB domain containing 6</i>                                     | ZBTB6         | 206098_at    | 2.74  | 0.03 |
| <i>zinc finger and BTB domain containing 8 opposite strand</i>                     | ZBTB8OS       | 228970_at    | 1.32  | 0.01 |
| <i>zinc finger CCCH-type containing 14</i>                                         | ZC3H14        | 213064_at    | 1.64  | 0.03 |
| <i>zinc finger, CCHC domain containing 11</i>                                      | ZCCHC11       | 217594_at    | 3.61  | 0.00 |
| <i>zinc finger, CCHC domain containing 5</i>                                       | ZCCHC5        | 1552935_at   | 2.14  | 0.00 |
| <i>zinc finger, DHHC-type containing 22</i>                                        | ZDHHC22       | 229805_at    | -1.31 | 0.01 |
| <i>zinc finger, FYVE domain containing 16</i>                                      | ZFYVE16       | 1555011_at   | -2.00 | 0.02 |
| <i>zinc finger, GRF-type containing 1</i>                                          | ZGRF1         | 231204_at    | 1.85  | 0.02 |
| <i>zinc fingers and homeoboxes 1</i>                                               | ZHX1          | 223213_s_at  | 1.39  | 0.00 |
| <i>zinc finger, MYM-type 4</i>                                                     | ZMYM4         | 202051_s_at  | 1.56  | 0.01 |
| <i>zinc finger protein 17</i>                                                      | ZNF17         | 1558183_at   | 2.70  | 0.04 |
| <i>zinc finger protein 182</i>                                                     | ZNF182        | 244024_at    | 1.31  | 0.00 |

|                                                      |                |              |       |      |
|------------------------------------------------------|----------------|--------------|-------|------|
| <i>zinc finger protein 221</i>                       | ZNF221         | 233848_x_at  | 2.28  | 0.01 |
| <i>zinc finger protein 280D</i>                      | ZNF280D        | 239107_at    | -1.91 | 0.02 |
| <i>zinc finger protein 304</i>                       | ZNF304         | 207753_at    | 1.87  | 0.03 |
| <i>zinc finger protein 33A</i>                       | ZNF33A         | 224276_at    | 1.55  | 0.04 |
| <i>zinc finger protein 41</i>                        | ZNF41          | 1553216_at   | 6.41  | 0.00 |
| <i>zinc finger protein 45</i>                        | ZNF45          | 207304_at    | 3.24  | 0.03 |
| <i>zinc finger protein 506</i>                       | ZNF506         | 221625_at    | 1.64  | 0.05 |
| <i>zinc finger protein 671</i>                       | ZNF671         | 219849_at    | 1.49  | 0.02 |
| <i>zinc finger protein 697</i>                       | ZNF697         | 1553702_at   | -2.17 | 0.03 |
| <i>zinc finger protein 75a</i>                       | ZNF75A         | 239204_at    | 2.29  | 0.00 |
| <i>zinc finger protein 777</i>                       | ZNF777         | 228687_at    | -1.64 | 0.04 |
| <i>ZNF790 antisense RNA 1</i>                        | ZNF790-<br>AS1 | 1558809_s_at | 4.70  | 0.04 |
| <i>zinc finger protein 804A</i>                      | ZNF804A        | 215767_at    | 3.81  | 0.03 |
| <i>zinc finger protein 84</i>                        | ZNF84          | 204453_at    | 1.97  | 0.01 |
| <i>zinc finger and SCAN domain containing<br/>12</i> | ZSCAN12        | 240181_at    | -4.25 | 0.03 |
| <i>zinc finger and SCAN domain containing<br/>30</i> | ZSCAN30        | 228125_at    | 1.46  | 0.02 |

---

**Table S3.** Significantly dysregulated biofunctions in fetuses of obese women identified by IPA

| Category                                                                                                       | Disease or Functional Annotation       | P-Value <sup>a</sup> | False Discovery Rate <sup>b</sup> | Activation Z-score | Number of Genes |
|----------------------------------------------------------------------------------------------------------------|----------------------------------------|----------------------|-----------------------------------|--------------------|-----------------|
| Cancer, Cellular Development, Cellular Growth and Proliferation                                                | tumorigenesis of melanoma cell lines   | 0.00                 | 0.26                              | -2                 | 4               |
| Cell Death and Survival, Nervous System Development and Function                                               | survival of sensory neurons            | 0.00                 | 0.26                              | -2.219             | 5               |
| Infectious Disease                                                                                             | infection of cells                     | 0.01                 | 0.26                              | 2.959              | 51              |
| Cellular Development, Embryonic Development                                                                    | differentiation of embryonic cells     | 0.01                 | 0.26                              | -2.296             | 14              |
| Neurological Disease                                                                                           | Neurodegeneration                      | 0.02                 | 0.26                              | 2.201              | 13              |
| Infectious Disease, Organismal Injury and Abnormalities                                                        | infection of embryonic cell lines      | 0.03                 | 0.26                              | 2.923              | 18              |
| Dermatological Diseases and Conditions, Infectious Disease                                                     | tuberculoid leprosy                    | 0.00                 | 0.13                              |                    | 7               |
| Infectious Disease                                                                                             | Viral Infection                        | 0.00                 | 0.26                              | 1.598              | 101             |
| Cell Cycle                                                                                                     | arrest in cell cycle progression       | 0.00                 | 0.26                              |                    | 26              |
| Tissue Morphology                                                                                              | abnormality of trophoblast giant cells | 0.00                 | 0.26                              |                    | 6               |
| Cancer, Endocrine System Disorders, Reproductive System Disease                                                | clear-cell ovarian carcinoma           | 0.00                 | 0.26                              |                    | 6               |
| Embryonic Development, Tissue Development                                                                      | proliferation of embryonic tissue      | 0.00                 | 0.26                              |                    | 9               |
| Endocrine System Development and Function, Molecular Transport, Protein Synthesis, Small Molecule Biochemistry | quantity of IGF1 in blood              | 0.00                 | 0.26                              | 0.728              | 7               |
| Behavior                                                                                                       | parental behavior                      | 0.00                 | 0.26                              |                    | 6               |
| Dermatological Diseases and Conditions, Infectious Disease                                                     | leprosy                                | 0.00                 | 0.26                              |                    | 10              |
| Tissue Morphology                                                                                              | abnormal morphology of trophoblast     | 0.00                 | 0.26                              |                    | 8               |
| RNA Post-Transcriptional Modification                                                                          | processing of RNA                      | 0.00                 | 0.26                              | 1.633              | 22              |



|                                                                                                                  |                                                |      |      |        |    |
|------------------------------------------------------------------------------------------------------------------|------------------------------------------------|------|------|--------|----|
| Cellular Assembly and Organization, Cellular Function and Maintenance                                            | hyperpolarization of mitochondria              | 0.00 | 0.26 |        | 3  |
| Hematological Disease, Immunological Disease, Infectious Disease                                                 | infection of myeloid cells                     | 0.00 | 0.26 | -0.447 | 5  |
| Cell Cycle                                                                                                       | interphase of T lymphocytes                    | 0.00 | 0.26 | 1      | 5  |
| Hereditary Disorder, Neurological Disease                                                                        | hereditary spastic paraplegia                  | 0.00 | 0.26 |        | 6  |
| Hematological Disease, Immunological Disease, Infectious Disease                                                 | infection of phagocytes                        | 0.00 | 0.26 | -0.555 | 6  |
| Hereditary Disorder, Infectious Disease                                                                          | familial atypical mycobacteriosis              | 0.00 | 0.26 |        | 3  |
| Cellular Movement, Hematological System Development and Function, Immune Cell Trafficking, Inflammatory Response | infiltration by monocyte-derived macrophages   | 0.00 | 0.26 |        | 3  |
| Molecular Transport, RNA Trafficking                                                                             | transport of mRNA                              | 0.00 | 0.26 |        | 7  |
| Behavior, Reproductive System Development and Function                                                           | maternal behavior                              | 0.00 | 0.26 |        | 5  |
| Cell Death and Survival                                                                                          | apoptosis of muscle cells                      | 0.00 | 0.26 | 0.169  | 20 |
| Endocrine System Development and Function, Organ Development                                                     | activation of thyroid gland                    | 0.00 | 0.26 |        | 3  |
| Cell Cycle                                                                                                       | cell cycle progression of eye cells            | 0.00 | 0.26 |        | 3  |
| Cancer, Neurological Disease                                                                                     | hyperplasia of brain cells                     | 0.00 | 0.26 |        | 3  |
| Hematological Disease, Immunological Disease, Infectious Disease                                                 | infection of leukocytes                        | 0.00 | 0.26 | 0.092  | 7  |
| Infectious Disease                                                                                               | infection by mycobacteria                      | 0.00 | 0.26 |        | 4  |
| Cell Cycle                                                                                                       | arrest in interphase of bone cancer cell lines | 0.00 | 0.26 |        | 6  |
| Endocrine System Development and Function, Organ Morphology                                                      | abnormal morphology of thyroid follicle        | 0.00 | 0.26 |        | 3  |
| Cell Signaling                                                                                                   | Ras protein signal transduction                | 0.00 | 0.26 |        | 7  |

|                                                                                                     |                                                 |      |      |        |    |
|-----------------------------------------------------------------------------------------------------|-------------------------------------------------|------|------|--------|----|
| Cell Signaling                                                                                      | small GTPase mediated signal transduction       | 0.00 | 0.26 |        | 14 |
| Neurological Disease, Organismal Injury and Abnormalities                                           | gliosis of brain                                | 0.00 | 0.26 | 0.555  | 5  |
| Cell Death and Survival                                                                             | cell death of muscle cells                      | 0.00 | 0.26 | 0.998  | 23 |
| Cell Cycle                                                                                          | cycling of centrosome                           | 0.00 | 0.26 |        | 7  |
| Cardiovascular System Development and Function, Cellular Movement                                   | chemotaxis of vascular endothelial cells        | 0.00 | 0.26 | 0      | 4  |
| Hereditary Disorder, Neurological Disease                                                           | hereditary motor and sensory neuropathy         | 0.00 | 0.26 |        | 8  |
| Molecular Transport, RNA Trafficking                                                                | export of mRNA                                  | 0.00 | 0.26 |        | 6  |
| Cell Death and Survival                                                                             | apoptosis of T lymphocytes                      | 0.00 | 0.26 | 0.184  | 20 |
| Cancer                                                                                              | development of breast carcinoma                 | 0.00 | 0.26 |        | 3  |
| Cancer, Cellular Development                                                                        | immortalization of leukocytes                   | 0.00 | 0.26 |        | 3  |
| Cellular Development, Cellular Growth and Proliferation                                             | proliferation of biliary epithelial cells       | 0.00 | 0.26 |        | 3  |
| Cellular Development                                                                                | immortalization                                 | 0.00 | 0.26 | -0.425 | 7  |
| Cell Cycle                                                                                          | arrest in cell cycle progression of blood cells | 0.00 | 0.26 |        | 4  |
| Cell Cycle                                                                                          | interphase of leukemia cell lines               | 0.00 | 0.26 |        | 5  |
| Endocrine System Development and Function, Organ Morphology                                         | morphology of thyroid gland                     | 0.00 | 0.26 |        | 5  |
| Infectious Disease                                                                                  | replication of RNA virus                        | 0.00 | 0.26 | -0.774 | 33 |
| Molecular Transport, Protein Trafficking                                                            | transport of protein                            | 0.01 | 0.26 |        | 20 |
| Cellular Development, Cellular Growth and Proliferation, Connective Tissue Development and Function | arrest in growth of fibroblasts                 | 0.01 | 0.26 |        | 4  |
| Cancer, Endocrine System Disorders                                                                  | hyperplasia of neuroendocrine cells             | 0.01 | 0.26 | -0.205 | 4  |
| Cancer                                                                                              | cell transformation                             | 0.01 | 0.26 | 0.599  | 31 |

|                                                                                                                                                                                                 |                                                  |      |      |        |     |
|-------------------------------------------------------------------------------------------------------------------------------------------------------------------------------------------------|--------------------------------------------------|------|------|--------|-----|
| Cell Cycle                                                                                                                                                                                      | G1 phase of T lymphocytes                        | 0.01 | 0.26 |        | 3   |
| Cell Cycle                                                                                                                                                                                      | arrest in G2/M phase of breast cancer cell lines | 0.01 | 0.26 |        | 3   |
| Cell-mediated Immune Response, Cellular Development, Cellular Function and Maintenance, Hematological System Development and Function, Hematopoiesis, Lymphoid Tissue Structure and Development | development of TREG cells                        | 0.01 | 0.26 |        | 3   |
| Cardiovascular System Development and Function, Embryonic Development, Tissue Development                                                                                                       | septation of outflow tract                       | 0.01 | 0.26 |        | 3   |
| Cellular Compromise, Organismal Injury and Abnormalities                                                                                                                                        | atrophy of cells                                 | 0.01 | 0.26 | 0      | 6   |
| Cell Death and Survival                                                                                                                                                                         | necrosis                                         | 0.01 | 0.26 | 0.54   | 126 |
| Cellular Function and Maintenance                                                                                                                                                               | maintenance of cells                             | 0.01 | 0.26 | 1.461  | 9   |
| Cell Death and Survival                                                                                                                                                                         | apoptosis of lymphocytes                         | 0.01 | 0.26 | 0.574  | 23  |
| Cellular Assembly and Organization                                                                                                                                                              | transport of endosomes                           | 0.01 | 0.26 |        | 5   |
| Cancer                                                                                                                                                                                          | hyperplasia of cells                             | 0.01 | 0.26 | -1.103 | 18  |
| Cell Morphology, Skeletal and Muscular System Development and Function                                                                                                                          | size of muscle cells                             | 0.01 | 0.26 | 1.177  | 10  |
| Embryonic Development, Organismal Development, Tissue Development                                                                                                                               | formation of anlage                              | 0.01 | 0.26 |        | 4   |
| DNA Replication, Recombination, and Repair                                                                                                                                                      | DNA replication                                  | 0.01 | 0.26 | -0.286 | 18  |
| Cellular Growth and Proliferation, Nervous System Development and Function, Tissue Development                                                                                                  | generation of neurons                            | 0.01 | 0.26 | -0.665 | 6   |
| Cell Cycle                                                                                                                                                                                      | cell cycle progression of T lymphocytes          | 0.01 | 0.26 |        | 5   |
| Cancer, Immunological Disease                                                                                                                                                                   | development of lymphoma                          | 0.01 | 0.26 |        | 5   |
| Cell Cycle                                                                                                                                                                                      | arrest in interphase                             | 0.01 | 0.26 |        | 26  |
| Cell Cycle                                                                                                                                                                                      | S phase of T                                     | 0.01 | 0.26 |        | 3   |

|                                                                                                                                   |                                                  |      |      |        |    |
|-----------------------------------------------------------------------------------------------------------------------------------|--------------------------------------------------|------|------|--------|----|
|                                                                                                                                   | lymphocytes                                      |      |      |        |    |
| Embryonic Development, Organismal Development, Tissue Development                                                                 | development of allantois                         | 0.01 | 0.26 |        | 3  |
| Cell-To-Cell Signaling and Interaction, Cellular Assembly and Organization, Cellular Function and Maintenance, Tissue Development | formation of focal complexes                     | 0.01 | 0.26 |        | 3  |
| Endocrine System Development and Function, Molecular Transport, Protein Synthesis, Small Molecule Biochemistry                    | quantity of TSH in blood                         | 0.01 | 0.26 |        | 3  |
| Cell Death and Survival, Hematological System Development and Function                                                            | survival of pro-B lymphocytes                    | 0.01 | 0.26 |        | 3  |
| Cell Cycle                                                                                                                        | G0 phase                                         | 0.01 | 0.26 |        | 8  |
| Cell Cycle                                                                                                                        | G1 phase of tumor cell lines                     | 0.01 | 0.26 | -1.109 | 15 |
| Cellular Function and Maintenance                                                                                                 | maintenance of T lymphocytes                     | 0.01 | 0.26 | 1.177  | 4  |
| Cell Cycle                                                                                                                        | G1 phase                                         | 0.01 | 0.26 | -0.156 | 25 |
| Embryonic Development, Tissue Development                                                                                         | proliferation of embryoblast                     | 0.01 | 0.26 |        | 6  |
| Cardiovascular System Development and Function, Cell Morphology, Skeletal and Muscular System Development and Function            | size of cardiomyocytes                           | 0.01 | 0.26 | 0.391  | 6  |
| Cell-To-Cell Signaling and Interaction                                                                                            | activation of tumor cell lines                   | 0.01 | 0.26 | 1.069  | 8  |
| Gene Expression                                                                                                                   | transactivation                                  | 0.01 | 0.26 | 1.391  | 37 |
| Cell Cycle                                                                                                                        | cell cycle progression                           | 0.01 | 0.26 | 0.777  | 60 |
| Cellular Development, Cellular Growth and Proliferation, Hematological System Development and Function                            | proliferation of B-lymphocyte derived cell lines | 0.01 | 0.26 | -0.114 | 10 |
| Cell Signaling, Post-Translational Modification                                                                                   | activation of MAP kinase kinase                  | 0.01 | 0.26 |        | 5  |
| Cell-To-Cell Signaling and Interaction                                                                                            | activation of leukemia cell lines                | 0.01 | 0.26 | 1.264  | 5  |
| Cancer, Endocrine System Disorders                                                                                                | hyperplasia of endocrine cells                   | 0.01 | 0.26 | 0.138  | 5  |

|                                                                                                  |                                                   |      |      |        |    |
|--------------------------------------------------------------------------------------------------|---------------------------------------------------|------|------|--------|----|
| Cell-To-Cell Signaling and Interaction                                                           | sensitization of cells                            | 0.01 | 0.26 | 1.109  | 5  |
| Gene Expression                                                                                  | transactivation of RNA                            | 0.01 | 0.26 | 1.065  | 36 |
| Cell Cycle, Connective Tissue Development and Function                                           | G1/S phase transition of fibroblast cell lines    | 0.01 | 0.26 |        | 4  |
| Cancer, Endocrine System Disorders, Reproductive System Disease                                  | mucinous ovarian cancer                           | 0.01 | 0.26 |        | 4  |
| Cellular Development, Cellular Growth and Proliferation, Nervous System Development and Function | proliferation of neuroglia                        | 0.01 | 0.26 | -0.277 | 10 |
| Cell Cycle                                                                                       | arrest in cell cycle progression of T lymphocytes | 0.01 | 0.26 |        | 3  |
| Cell Death and Survival, Nervous System Development and Function                                 | cell viability of striatal neurons                | 0.01 | 0.26 |        | 3  |
| Hereditary Disorder, Neurological Disease                                                        | familial amyotrophic lateral sclerosis            | 0.01 | 0.26 |        | 3  |
| Metabolic Disease                                                                                | impaired glucose tolerance                        | 0.01 | 0.26 |        | 3  |
| Cancer                                                                                           | onset of tumorigenesis                            | 0.01 | 0.26 |        | 3  |
| Cell Cycle                                                                                       | delay in initiation of interphase                 | 0.01 | 0.26 | -1.706 | 6  |

*IPA*, Ingenuity Pathways Analysis

<sup>a</sup>Right-tailed Fisher's exact p-value

<sup>b</sup>Benjamini-Hochberg p-value

**Table S4.** Significantly activated and inhibited upstream regulators in fetuses of obese women

| Symbol      | Upstream Regulator Name                       | Molecule Function <sup>a</sup>                                                                                                                                                                                                                                                 | Predicted Activation State | Activation Z-score | Number of downstream target genes |
|-------------|-----------------------------------------------|--------------------------------------------------------------------------------------------------------------------------------------------------------------------------------------------------------------------------------------------------------------------------------|----------------------------|--------------------|-----------------------------------|
| <i>CREM</i> | cAMP responsive element modulator             | cAMP-mediated signaling, cell differentiation. Implicated in neurodegeneration, circadian regulation of gene expression, fatty acid metabolism, glucose metabolism, regulation of apoptosis, diabetes mellitus/insulin resistance                                              | Activated                  | 2.00               | 7                                 |
| N/A         | salmonella minnesota R595 lipopolysaccharides | Cytokine-mediated and toll-like receptor inflammatory signaling                                                                                                                                                                                                                | Activated                  | 2.00               | 4                                 |
| <i>KAT5</i> | K(lysine) acetyltransferase 5                 | Androgen-receptor signaling, cellular response to estradiol, DNA damage response, negative regulation of transcription from RNA polymerase II promoter                                                                                                                         | Activated                  | 2.00               | 4                                 |
| <i>OSM</i>  | oncostatin M                                  | Cytokine-mediated and acute phase response signaling, recognition of bacteria and viruses, immune response, positive regulation of acute inflammatory response, positive regulation of apoptotic signaling, peripheral nervous system development, behavioral response to pain | Activated                  | 2.08               | 25                                |
| <i>TNF</i>  | Tumor necrosis factor                         | Pro-inflammatory cytokine secreted by macrophages. Implicated in inflammatory response, cell proliferation, apoptosis induction, lipid metabolism, coagulation                                                                                                                 | Activated                  | 2.15               | 55                                |
| etoposide   | etoposide                                     | Topoisomerase inhibitor. Used to treat a wide range of cancers including leukemias, lymphomas and solid cancers                                                                                                                                                                | Activated                  | 2.16               | 8                                 |

|                                                     |                                             |                                                                                                                                                                                                                                                                                                                |           |      |    |
|-----------------------------------------------------|---------------------------------------------|----------------------------------------------------------------------------------------------------------------------------------------------------------------------------------------------------------------------------------------------------------------------------------------------------------------|-----------|------|----|
| <i>FIGF, PDGFC, PGF, PROK1, VEGFA, VEGFB, VEGFC</i> | Vascular endothelial growth factor group    | Vegf signaling, angiogenesis, axonal guidance signaling, mTOR signaling, cytokine-mediated signaling                                                                                                                                                                                                           | Activated | 2.16 | 11 |
| <i>MYD88</i>                                        | Myeloid differentiation primary response 88 | Adapter protein central to innate and adaptive immune response, essential signal transducer in IL-1 and toll-like receptor signaling pathways, activates numerous proinflammatory genes. Implicated in acute phase response, cytokine-mediated signaling, recognition of bacteria and viruses, response to LPS | Activated | 2.17 | 5  |
| <i>TP53</i>                                         | Tumor protein p53                           | Tumor suppressor protein, responds to cellular stress to induce cell cycle arrest, apoptosis, senescence, or DNA repair. Mutations associated with human cancers                                                                                                                                               | Activated | 2.17 | 45 |
| H89                                                 | H89                                         | Protein kinase A inhibitor; also inhibits several other kinases, and regulates <i>CREB, Erk1/2, TNF, NOS3, FOS, MAPK</i> . Used to treat dopaminergic, GABAergic, and excitotoxic disorders                                                                                                                    | Activated | 2.18 | 5  |
| N/A                                                 | streptozocin                                | Aminoglycoside antibiotic used as an anticancer agent. Regulates glucose, insulin, inflammatory regulators. Implicated in apoptosis, necrosis, cell proliferation, cell destruction                                                                                                                            | Activated | 2.19 | 8  |
| N/A                                                 | metribolone: methyltrienolone               | Synthetic non-aromatizable androgen and anabolic steroid. Binds strongly to androgen receptor                                                                                                                                                                                                                  | Activated | 2.19 | 6  |

|               |                                        |                                                                                                                                                                                                                                                                             |           |      |    |
|---------------|----------------------------------------|-----------------------------------------------------------------------------------------------------------------------------------------------------------------------------------------------------------------------------------------------------------------------------|-----------|------|----|
| N/A           | resveratrol: 3,4',5-trihydroxystilbene | Antioxidant phenol derivative found in plants. Anti-inflammatory, anticoagulant, anti-atherogenic properties. Investigated for treatment of obesity, metabolic syndrome, disorders of lipid metabolism, insulin resistance, Alzheimer's disease, Friedreich ataxia, cancers | Activated | 2.19 | 6  |
| N/A           | 6-hydroxydopamine: oxidopamine         | Neurotransmitter analogue that depletes noradrenergic stores in nerve endings, reduces brain dopamine levels. Produces cytolytic free radicals. Implicated in cell death, apoptosis, neurodegeneration, Parkinson's disease                                                 | Activated | 2.22 | 5  |
| <i>IFNG</i>   | interferon gamma                       | Member of type II interferon family. Cytokine with antiviral, immunoregulatory and anti-tumor properties, potent macrophage activator. Implicated in adaptive immune response, antigen processing, apoptosis, T cell differentiation and proliferation                      | Activated | 2.29 | 37 |
| N/A           | bucladesine: dibutyryl cAMP            | Cyclic nucleotide derivative that mimics endogenous cAMP. Vasodilatory properties, used as a cardiac stimulant in treatment of heart failure. Investigated as a treatment for metabolic disorders                                                                           | Activated | 2.38 | 9  |
| <i>TICAM1</i> | toll-like receptor adaptor molecule 1  | Toll-like receptor signaling, response to bacteria and viruses, apoptotic signaling pathway, Innate immune response; lipopolysaccharide-mediated signaling pathway; positive regulation of B cell                                                                           | Activated | 2.43 | 6  |



proliferation and  
differentiation

|                                           |                                                     |                                                                                                                                                                                                                                    |           |       |    |
|-------------------------------------------|-----------------------------------------------------|------------------------------------------------------------------------------------------------------------------------------------------------------------------------------------------------------------------------------------|-----------|-------|----|
| <i>MYC</i>                                | v-myc avian myelocytomatosis viral oncogene homolog | Cell cycle regulation, DNA damage response, apoptosis regulation, canonical Wnt receptor signaling pathway, Notch signaling pathway, cellular response to carbohydrate and estradiol stimulus, cellular response to growth hormone | Activated | 2.45  | 33 |
| <i>IFNA1/IFNA13, IFNA21, IFNA5, IFNB1</i> | Interferon alpha/beta group                         | Cytokine-mediated signaling, communication between innate and adaptive immune cells, recognition of bacteria and viruses, B cell proliferation and differentiation, T-cell activation                                              | Activated | 2.45  | 6  |
| N/A                                       | calcitriol (1,25-dihydroxyvitamin D3)               | 1,25-dihydroxyvitamin D3 biosynthesis; IL-12 signaling                                                                                                                                                                             | Activated | 2.48  | 14 |
| LPS                                       | lipopolysaccharide                                  | Cytokine-mediated signaling, toll-like receptor signaling, crosstalk between innate and adaptive immune cells, recognition of bacteria and viruses, reactive oxygen production in macrophages                                      | Activated | 3.09  | 56 |
| miR-16-5p                                 | miR-16-5p (and other miRNAs w/seed AGCAGCA)         | Cell cycle progression, apoptotic signaling                                                                                                                                                                                        | Inhibited | -2.64 | 11 |
| miR-155-5p                                | miR-155-5p (miRNAs w/seed UAAUGCU)                  | Cytokine-mediated signaling. Regulated by LPS, enterotoxin, Vegf                                                                                                                                                                   | Inhibited | -2.61 | 7  |
| <i>Ins1</i>                               | Insulin 1                                           | Insulin-receptor signaling, glucose homeostasis, adipogenesis, fatty acid metabolism, negative regulation of acute phase response                                                                                                  | Inhibited | -2.60 | 12 |

|                                            |                                                     |                                                                                                                                                                                                                                                                                                                |           |       |    |
|--------------------------------------------|-----------------------------------------------------|----------------------------------------------------------------------------------------------------------------------------------------------------------------------------------------------------------------------------------------------------------------------------------------------------------------|-----------|-------|----|
| <i>STAT5A</i>                              | signal transducer and activator of transcription 5A | Cytokine-mediated signaling, growth hormone and JAK/STAT signaling, glucocorticoid receptor signaling, negative regulation of apoptosis, positive regulation of B and T cell proliferation and differentiation                                                                                                 | Inhibited | -2.37 | 6  |
| <i>HRAS, KRAS, MRAS, NRAS, RRAS, RRAS2</i> | Rat sarcoma viral oncogene homolog family           | Cell cycle progression, growth and differentiation; cytokine and acute phase response signaling; apoptosis                                                                                                                                                                                                     | Inhibited | -2.22 | 5  |
| <i>EPAS1</i>                               | Endothelial PAS domain protein 1                    | Induction of genes regulated by low oxygen levels, angiogenesis, cellular response to hypoxia and oxidative stress, iron homeostasis<br>Acute phase response, cellular response to growth factor stimulus, cytokine-mediated signaling,                                                                        | Inhibited | -2.20 | 7  |
| <i>STAT5B</i>                              | Signal transducer and activator of transcription 5B | positive regulation of inflammatory response, positive regulation of T and B- cell proliferation and differentiation, fatty acid metabolism, lipid storage<br>Axonal guidance/BDNF-signaling, estrogen signaling, cardiac morphogenesis, limb and branchial arch development, growth hormone signaling<br>mTOR | Inhibited | -2.18 | 8  |
| miR -1-3p                                  | miR-1-3p (and other miRNAs w/seed GGAAUGU)          | inhibitor/immunosuppressant, inhibits IL-2 and other cytokine receptor-dependent signal transduction, ultimately inhibits activation of T and B lymphocytes                                                                                                                                                    | Inhibited | -2.08 | 16 |
| N/A                                        | Sunitinib                                           | Insulin-induced gene involved in regulation of cholesterol homeostasis, lipid metabolism                                                                                                                                                                                                                       | Inhibited | -2.06 | 22 |
| <i>INSIG1</i>                              | Insulin induced gene 1                              |                                                                                                                                                                                                                                                                                                                | Inhibited | -2.00 | 4  |

|                                                |                                    |                                                                                                                                                                                                                                                                            |           |       |   |
|------------------------------------------------|------------------------------------|----------------------------------------------------------------------------------------------------------------------------------------------------------------------------------------------------------------------------------------------------------------------------|-----------|-------|---|
| <i>ADRB1,</i><br><i>ADRB2,</i><br><i>ADRB3</i> | Beta Adrenergic<br>Receptor Family | Adrenergic/epinephrine<br>and norepinephrine-<br>mediated signaling; fear<br>response; regulation of<br>cardiomyocyte<br>development; positive<br>regulation of heart rate and<br>contractility; lipid<br>homeostasis; brown fat cell<br>differentiation;thermogene<br>sis | Inhibited | -2.00 | 4 |
|------------------------------------------------|------------------------------------|----------------------------------------------------------------------------------------------------------------------------------------------------------------------------------------------------------------------------------------------------------------------------|-----------|-------|---|

---

<sup>a</sup> Gene/molecule functions obtained from the following databases: UniProt, EntrezGene, PubChem, Ingenuity Knowledge Base. Descriptions modified due to space constraints.

**Table S5.** Significantly dysregulated gene sets in fetuses of obese women identified by GSEA/DPLAT

| Gene Set                                                               | Number of Genes in Gene Set | Normalized Enrichment Score | P-value <sup>a</sup> | FDR q-value <sup>b</sup> |
|------------------------------------------------------------------------|-----------------------------|-----------------------------|----------------------|--------------------------|
| JAK-STAT CASCADE                                                       | 45                          | 2.03                        | 0.00                 | 0.02                     |
| JAK-STAT CASCADE INVOLVED IN GROWTH HORMONE SIGNALING PATHWAY          | 24                          | 1.97                        | 0.00                 | 0.04                     |
| GROWTH HORMONE RECEPTOR SIGNALING PATHWAY                              | 27                          | 1.91                        | 0.00                 | 0.09                     |
| RESPONSE TO GROWTH HORMONE STIMULUS                                    | 27                          | 1.91                        | 0.00                 | 0.07                     |
| REGULATION OF RESPONSE TO INTERFERON-GAMMA                             | 20                          | 1.90                        | 0.00                 | 0.07                     |
| CELLULAR RESPONSE TO GROWTH HORMONE STIMULUS                           | 27                          | 1.89                        | 0.00                 | 0.06                     |
| NEGATIVE REGULATION OF AXON EXTENSION                                  | 16                          | 1.85                        | 0.00                 | 0.11                     |
| REGULATION OF CHROMOSOME SEGREGATION                                   | 23                          | 1.85                        | 0.00                 | 0.10                     |
| REGULATION OF INTERFERON-GAMMA-MEDIATED SIGNALING PATHWAY              | 19                          | 1.84                        | 0.00                 | 0.10                     |
| TELENCEPHALON CELL MIGRATION                                           | 38                          | 1.83                        | 0.00                 | 0.11                     |
| REGULATION OF MRNA PROCESSING                                          | 28                          | 1.82                        | 0.00                 | 0.12                     |
| FOREBRAIN CELL MIGRATION                                               | 41                          | 1.82                        | 0.00                 | 0.13                     |
| REGULATION OF EPIDERMIS DEVELOPMENT                                    | 15                          | 1.81                        | 0.00                 | 0.13                     |
| M PHASE OF MITOTIC CELL CYCLE                                          | 143                         | 1.81                        | 0.00                 | 0.13                     |
| NEGATIVE REGULATION OF DEVELOPMENTAL GROWTH                            | 24                          | 1.81                        | 0.00                 | 0.12                     |
| NUCLEAR DIVISION                                                       | 135                         | 1.80                        | 0.00                 | 0.13                     |
| MITOSIS                                                                | 135                         | 1.79                        | 0.00                 | 0.13                     |
| REGULATION OF ANDROGEN RECEPTOR SIGNALING PATHWAY                      | 20                          | 1.78                        | 0.00                 | 0.15                     |
| ORGANELLE FISSION                                                      | 149                         | 1.78                        | 0.00                 | 0.15                     |
| REGULATION OF INTRACELLULAR STEROID HORMONE RECEPTOR SIGNALING PATHWAY | 35                          | 1.77                        | 0.00                 | 0.17                     |
| NUCLEAR-TRANSCRIBED MRNA POLY(A) TAIL SHORTENING                       | 20                          | 1.76                        | 0.00                 | 0.18                     |
| PEPTIDYL-SERINE MODIFICATION                                           | 57                          | 1.75                        | 0.00                 | 0.19                     |
| MICROTUBULE CYTOSKELETON ORGANIZATION                                  | 132                         | 1.75                        | 0.00                 | 0.18                     |

|                                                                                                    |     |      |      |      |
|----------------------------------------------------------------------------------------------------|-----|------|------|------|
| NATURAL KILLER CELL<br>DIFFERENTIATION                                                             | 13  | 1.75 | 0.00 | 0.18 |
| NEGATIVE REGULATION OF<br>AXONOGENESIS                                                             | 39  | 1.75 | 0.00 | 0.18 |
| NUCLEAR PORE ORGANIZATION                                                                          | 10  | 1.75 | 0.00 | 0.18 |
| NCRNA CATABOLIC PROCESS                                                                            | 9   | 1.75 | 0.00 | 0.17 |
| CELLULAR RESPONSE TO IONIZING<br>RADIATION                                                         | 22  | 1.74 | 0.00 | 0.17 |
| REGULATION OF TRANSLATION                                                                          | 106 | 1.74 | 0.00 | 0.17 |
| REGULATION OF KERATINOCYTE<br>DIFFERENTIATION                                                      | 11  | 1.74 | 0.00 | 0.18 |
| 'DE NOVO' POSTTRANSLATIONAL<br>PROTEIN FOLDING                                                     | 29  | 1.73 | 0.00 | 0.19 |
| PROTEIN<br>HOMOTETRAMERIZATION                                                                     | 26  | 1.73 | 0.00 | 0.18 |
| GENE SILENCING                                                                                     | 44  | 1.73 | 0.00 | 0.19 |
| 'DE NOVO' PROTEIN FOLDING                                                                          | 33  | 1.73 | 0.00 | 0.18 |
| SPINDLE ASSEMBLY                                                                                   | 22  | 1.73 | 0.00 | 0.18 |
| REGULATION OF EPIDERMAL CELL<br>DIFFERENTIATION                                                    | 12  | 1.73 | 0.01 | 0.17 |
| REGULATION OF HELICASE<br>ACTIVITY                                                                 | 8   | 1.73 | 0.00 | 0.17 |
| POST-GOLGI VESICLE-MEDIATED<br>TRANSPORT                                                           | 62  | 1.72 | 0.00 | 0.18 |
| RESPONSE TO IONIZING<br>RADIATION                                                                  | 47  | 1.72 | 0.00 | 0.18 |
| RNA 3'-END PROCESSING                                                                              | 62  | 1.72 | 0.00 | 0.18 |
| NUCLEAR IMPORT                                                                                     | 50  | 1.71 | 0.00 | 0.18 |
| POSITIVE REGULATION OF<br>NEURON DEATH                                                             | 13  | 1.71 | 0.00 | 0.18 |
| ORGANELLE LOCALIZATION                                                                             | 107 | 1.71 | 0.00 | 0.18 |
| REGULATION OF MICROTUBULE-<br>BASED PROCESS                                                        | 59  | 1.71 | 0.00 | 0.18 |
| CENTRAL NERVOUS SYSTEM<br>NEURON AXONOGENESIS                                                      | 23  | 1.71 | 0.01 | 0.18 |
| G2/M TRANSITION OF MITOTIC<br>CELL CYCLE                                                           | 97  | 1.70 | 0.00 | 0.18 |
| EMBRYONIC CRANIAL SKELETON<br>MORPHOGENESIS                                                        | 36  | 1.70 | 0.00 | 0.18 |
| PORE COMPLEX ASSEMBLY                                                                              | 9   | 1.70 | 0.00 | 0.18 |
| CYTOKINESIS                                                                                        | 67  | 1.70 | 0.00 | 0.18 |
| MITOCHONDRIAL FISSION                                                                              | 8   | 1.70 | 0.00 | 0.19 |
| REGULATION OF RNA SPLICING                                                                         | 32  | 1.70 | 0.00 | 0.18 |
| NEGATIVE REGULATION OF<br>EPITHELIAL CELL PROLIFERATION                                            | 47  | 1.70 | 0.00 | 0.18 |
| REGULATION OF NUCLEAR-<br>TRANSCRIBED MRNA CATABOLIC<br>PROCESS, DEADENYLATION-<br>DEPENDENT DECAY | 9   | 1.70 | 0.00 | 0.18 |

|                                                                               |     |      |      |      |
|-------------------------------------------------------------------------------|-----|------|------|------|
| MITOTIC PROMETAPHASE                                                          | 71  | 1.69 | 0.00 | 0.18 |
| RNA STABILIZATION                                                             | 20  | 1.69 | 0.01 | 0.18 |
| REGULATION OF ALTERNATIVE<br>MRNA SPLICING, VIA<br>SPLICEOSOME                | 8   | 1.69 | 0.01 | 0.18 |
| POSITIVE REGULATION OF<br>EPIDERMIS DEVELOPMENT                               | 8   | 1.69 | 0.01 | 0.19 |
| MRNA 3'-END PROCESSING                                                        | 55  | 1.68 | 0.00 | 0.18 |
| PROTEIN TARGETING TO NUCLEUS                                                  | 49  | 1.68 | 0.00 | 0.18 |
| REGULATION OF NUCLEAR-<br>TRANSCRIBED MRNA POLY(A) TAIL<br>SHORTENING         | 9   | 1.68 | 0.00 | 0.18 |
| REGULATION OF MICROTUBULE<br>CYTOSKELETON ORGANIZATION                        | 49  | 1.68 | 0.00 | 0.18 |
| NEGATIVE REGULATION OF<br>CYTOSKELETON ORGANIZATION                           | 33  | 1.68 | 0.01 | 0.19 |
| MRNA STABILIZATION                                                            | 20  | 1.68 | 0.00 | 0.18 |
| PEPTIDYL-SERINE<br>PHOSPHORYLATION                                            | 54  | 1.68 | 0.00 | 0.18 |
| NEGATIVE REGULATION OF MAP<br>KINASE ACTIVITY                                 | 39  | 1.68 | 0.00 | 0.18 |
| REGULATION OF CELL CYCLE<br>PHASE TRANSITION                                  | 123 | 1.68 | 0.00 | 0.18 |
| NEGATIVE REGULATION OF AXON<br>EXTENSION INVOLVED IN AXON<br>GUIDANCE         | 7   | 1.67 | 0.01 | 0.19 |
| PROTEIN IMPORT INTO NUCLEUS                                                   | 49  | 1.67 | 0.00 | 0.19 |
| REGULATION OF MITOTIC CELL<br>CYCLE PHASE TRANSITION                          | 123 | 1.67 | 0.00 | 0.19 |
| VIRAL ENTRY INTO HOST CELL                                                    | 10  | 1.67 | 0.01 | 0.19 |
| REGULATION OF B CELL<br>PROLIFERATION                                         | 27  | 1.67 | 0.01 | 0.19 |
| CELL DIVISION                                                                 | 102 | 1.67 | 0.00 | 0.19 |
| NUCLEOCYTOPLASMIC<br>TRANSPORT                                                | 121 | 1.66 | 0.00 | 0.19 |
| DENTATE GYRUS DEVELOPMENT                                                     | 14  | 1.66 | 0.01 | 0.20 |
| T CELL DIFFERENTIATION                                                        | 105 | 1.66 | 0.00 | 0.20 |
| REGULATION OF PROTEASOMAL<br>PROTEIN CATABOLIC PROCESS                        | 55  | 1.66 | 0.00 | 0.20 |
| NEGATIVE REGULATION OF G1/S<br>TRANSITION OF MITOTIC CELL<br>CYCLE            | 74  | 1.65 | 0.00 | 0.20 |
| POSITIVE REGULATION OF<br>NUCLEAR-TRANSCRIBED MRNA<br>POLY(A) TAIL SHORTENING | 8   | 1.65 | 0.02 | 0.20 |
| KERATINOCYTE DIFFERENTIATION                                                  | 50  | 1.65 | 0.00 | 0.21 |
| NEGATIVE REGULATION OF<br>MITOTIC CELL CYCLE PHASE<br>TRANSITION              | 102 | 1.65 | 0.00 | 0.21 |

|                                                                                                    |     |      |      |      |
|----------------------------------------------------------------------------------------------------|-----|------|------|------|
| CEREBRAL CORTEX NEURON<br>DIFFERENTIATION                                                          | 16  | 1.65 | 0.01 | 0.21 |
| PROTEIN TETRAMERIZATION                                                                            | 47  | 1.65 | 0.00 | 0.20 |
| ESTABLISHMENT OF ORGANELLE<br>LOCALIZATION                                                         | 75  | 1.65 | 0.00 | 0.20 |
| SPINDLE ORGANIZATION                                                                               | 37  | 1.65 | 0.01 | 0.21 |
| GOLGI VESICLE TRANSPORT                                                                            | 116 | 1.64 | 0.00 | 0.21 |
| POSITIVE REGULATION OF MRNA<br>PROCESSING                                                          | 15  | 1.64 | 0.01 | 0.21 |
| REGULATION OF MRNA<br>CATABOLIC PROCESS                                                            | 12  | 1.64 | 0.01 | 0.21 |
| REGULATION OF ANION<br>TRANSPORT                                                                   | 23  | 1.64 | 0.01 | 0.20 |
| PEPTIDYL-THREONINE<br>MODIFICATION                                                                 | 27  | 1.64 | 0.00 | 0.21 |
| NEGATIVE REGULATION OF<br>CYSTEINE-TYPE ENDOPEPTIDASE<br>ACTIVITY                                  | 48  | 1.64 | 0.00 | 0.21 |
| BRAIN MORPHOGENESIS                                                                                | 27  | 1.64 | 0.01 | 0.21 |
| TOLL-LIKE RECEPTOR 2 SIGNALING<br>PATHWAY                                                          | 63  | 1.64 | 0.00 | 0.21 |
| CHAPERONE-MEDIATED PROTEIN<br>FOLDING                                                              | 12  | 1.63 | 0.00 | 0.21 |
| REGULATION OF G1/S<br>TRANSITION OF MITOTIC CELL<br>CYCLE                                          | 86  | 1.63 | 0.00 | 0.21 |
| NEGATIVE REGULATION OF CELL<br>CYCLE PHASE TRANSITION                                              | 102 | 1.63 | 0.00 | 0.21 |
| REGULATION OF MITOTIC<br>METAPHASE/ANAPHASE<br>TRANSITION                                          | 34  | 1.63 | 0.01 | 0.21 |
| REGULATION OF DENDRITIC SPINE<br>MORPHOGENESIS                                                     | 14  | 1.63 | 0.01 | 0.21 |
| NEGATIVE REGULATION OF<br>CYSTEINE-TYPE ENDOPEPTIDASE<br>ACTIVITY INVOLVED IN<br>APOPTOTIC PROCESS | 45  | 1.63 | 0.00 | 0.21 |
| RESPONSE TO ANTIBIOTIC                                                                             | 16  | 1.63 | 0.01 | 0.22 |
| RESPONSE TO INTERLEUKIN-6                                                                          | 13  | 1.63 | 0.01 | 0.22 |
| POSITIVE REGULATION OF<br>NEURON APOPTOTIC PROCESS                                                 | 12  | 1.62 | 0.01 | 0.22 |
| MICROTUBULE-BASED<br>MOVEMENT                                                                      | 68  | 1.62 | 0.00 | 0.22 |
| AEROBIC RESPIRATION                                                                                | 31  | 1.62 | 0.01 | 0.22 |
| REGULATION OF FILOPODIUM<br>ASSEMBLY                                                               | 18  | 1.62 | 0.01 | 0.22 |
| VISUAL LEARNING                                                                                    | 10  | 1.62 | 0.01 | 0.22 |
| REGULATION OF MRNA SPLICING,<br>VIA SPLICEOSOME                                                    | 14  | 1.62 | 0.01 | 0.22 |

|                                                                                         |     |      |      |      |
|-----------------------------------------------------------------------------------------|-----|------|------|------|
| POSITIVE REGULATION OF CELL CYCLE                                                       | 74  | 1.62 | 0.00 | 0.23 |
| REGULATION OF EPITHELIAL CELL DIFFERENTIATION                                           | 31  | 1.62 | 0.00 | 0.23 |
| OLFACTORY LOBE DEVELOPMENT                                                              | 24  | 1.62 | 0.01 | 0.22 |
| SIGNAL TRANSDUCTION IN RESPONSE TO DNA DAMAGE                                           | 88  | 1.62 | 0.00 | 0.23 |
| FAT CELL DIFFERENTIATION                                                                | 74  | 1.61 | 0.00 | 0.23 |
| CEREBRAL CORTEX CELL MIGRATION                                                          | 29  | 1.61 | 0.01 | 0.23 |
| GOLGI ORGANIZATION                                                                      | 29  | 1.61 | 0.01 | 0.23 |
| TYPE B PANCREATIC CELL DEVELOPMENT                                                      | 11  | 1.61 | 0.01 | 0.23 |
| PROTEIN POLYUBIQUITINATION                                                              | 144 | 1.61 | 0.00 | 0.23 |
| REGULATION OF LYMPHOCYTE CHEMOTAXIS                                                     | 12  | 1.61 | 0.01 | 0.23 |
| ACTIVATION OF SIGNALING PROTEIN ACTIVITY INVOLVED IN UNFOLDED PROTEIN RESPONSE          | 63  | 1.61 | 0.00 | 0.23 |
| NEGATIVE REGULATION OF ORGANELLE ORGANIZATION                                           | 111 | 1.61 | 0.00 | 0.23 |
| PANTOTHENATE METABOLIC PROCESS                                                          | 11  | 1.61 | 0.01 | 0.23 |
| NUCLEAR TRANSPORT                                                                       | 124 | 1.61 | 0.00 | 0.23 |
| OLFACTORY BULB DEVELOPMENT                                                              | 24  | 1.61 | 0.01 | 0.23 |
| REGULATION OF RELEASE OF SEQUESTERED CALCIUM ION INTO CYTOSOL BY SARCOPLASMIC RETICULUM | 15  | 1.61 | 0.02 | 0.23 |
| GTP METABOLIC PROCESS                                                                   | 89  | 1.61 | 0.00 | 0.23 |
| PROTEIN MODIFICATION BY SMALL PROTEIN REMOVAL                                           | 70  | 1.60 | 0.00 | 0.23 |
| GTP CATABOLIC PROCESS                                                                   | 88  | 1.60 | 0.00 | 0.23 |
| NEGATIVE REGULATION OF TRANSLATION                                                      | 45  | 1.60 | 0.00 | 0.22 |
| SIGNAL TRANSDUCTION BY PHOSPHORYLATION                                                  | 29  | 1.60 | 0.01 | 0.23 |
| NEGATIVE REGULATION OF PROTEIN DEPOLYMERIZATION                                         | 19  | 1.60 | 0.01 | 0.23 |
| MICROTUBULE ORGANIZING CENTER ORGANIZATION                                              | 39  | 1.60 | 0.01 | 0.23 |
| CILIUM MORPHOGENESIS                                                                    | 83  | 1.60 | 0.00 | 0.24 |
| T CELL DIFFERENTIATION IN THYMUS                                                        | 49  | 1.60 | 0.01 | 0.24 |
| GENE SILENCING BY RNA                                                                   | 31  | 1.60 | 0.01 | 0.24 |
| CEREBRAL CORTEX RADIAL GLIA GUIDED MIGRATION                                            | 11  | 1.60 | 0.01 | 0.23 |
| NEGATIVE REGULATION OF CELL CYCLE PROCESS                                               | 137 | 1.59 | 0.00 | 0.24 |



|                                                                       |     |      |      |      |
|-----------------------------------------------------------------------|-----|------|------|------|
| ER TO GOLGI VESICLE-MEDIATED<br>TRANSPORT                             | 26  | 1.59 | 0.01 | 0.24 |
| RENAL TUBULE MORPHOGENESIS                                            | 18  | 1.59 | 0.02 | 0.24 |
| REGULATION OF<br>PHOSPHATIDYLINOSITOL 3-KINASE<br>CASCADE             | 44  | 1.59 | 0.01 | 0.24 |
| PROTEIN COMPLEX LOCALIZATION                                          | 17  | 1.59 | 0.01 | 0.24 |
| TOLL-LIKE RECEPTOR 1 SIGNALING<br>PATHWAY                             | 61  | 1.59 | 0.00 | 0.24 |
| REGULATION OF NUCLEASE<br>ACTIVITY                                    | 71  | 1.59 | 0.00 | 0.24 |
| MYD88-DEPENDENT TOLL-LIKE<br>RECEPTOR SIGNALING PATHWAY               | 66  | 1.59 | 0.00 | 0.24 |
| N-ACETYLGLUCOSAMINE<br>METABOLIC PROCESS                              | 8   | 1.59 | 0.02 | 0.25 |
| GENE SILENCING BY MIRNA                                               | 23  | 1.59 | 0.01 | 0.24 |
| EPIDERMAL CELL<br>DIFFERENTIATION                                     | 61  | 1.58 | 0.00 | 0.24 |
| GUANOSINE-CONTAINING<br>COMPOUND CATABOLIC PROCESS                    | 90  | 1.58 | 0.00 | 0.24 |
| CELLULAR RESPONSE TO<br>INTERLEUKIN-6                                 | 10  | 1.58 | 0.01 | 0.24 |
| REGULATION OF ATTACHMENT OF<br>SPINDLE MICROTUBULES TO<br>KINETOCHORE | 7   | 1.58 | 0.01 | 0.24 |
| TRICARBOXYLIC ACID CYCLE                                              | 20  | 1.58 | 0.01 | 0.24 |
| ENTRY INTO HOST CELL                                                  | 13  | 1.58 | 0.02 | 0.24 |
| LAYER FORMATION IN CEREBRAL<br>CORTEX                                 | 7   | 1.58 | 0.02 | 0.24 |
| LEARNING                                                              | 23  | 1.58 | 0.02 | 0.24 |
| REGULATION OF MRNA 3'-END<br>PROCESSING                               | 13  | 1.58 | 0.02 | 0.24 |
| PROTEIN<br>AUTOPHOSPHORYLATION                                        | 119 | 1.58 | 0.00 | 0.24 |
| GUANOSINE-CONTAINING<br>COMPOUND METABOLIC PROCESS                    | 95  | 1.58 | 0.00 | 0.24 |
| PROTEIN DEUBIQUITINATION                                              | 57  | 1.58 | 0.00 | 0.24 |
| POSITIVE REGULATION OF MRNA<br>CATABOLIC PROCESS                      | 11  | 1.58 | 0.02 | 0.24 |
| PROTEIN FOLDING                                                       | 89  | 1.58 | 0.00 | 0.24 |
| REGULATION OF COFACTOR<br>METABOLIC PROCESS                           | 11  | 1.58 | 0.02 | 0.24 |
| REGULATION OF ACYL-COA<br>BIOSYNTHETIC PROCESS                        | 11  | 1.58 | 0.02 | 0.24 |
| NUCLEUS ORGANIZATION                                                  | 34  | 1.58 | 0.01 | 0.24 |
| CELLULAR RESPONSE TO CALCIUM<br>ION                                   | 19  | 1.58 | 0.02 | 0.24 |
| MOVEMENT IN HOST<br>ENVIRONMENT                                       | 13  | 1.58 | 0.02 | 0.24 |

|                                                                                                  |    |      |      |      |
|--------------------------------------------------------------------------------------------------|----|------|------|------|
| REGULATION OF COENZYME METABOLIC PROCESS                                                         | 11 | 1.58 | 0.01 | 0.24 |
| RENAL TUBULE DEVELOPMENT                                                                         | 23 | 1.57 | 0.02 | 0.24 |
| ASSOCIATIVE LEARNING                                                                             | 12 | 1.57 | 0.02 | 0.25 |
| ENTRY INTO CELL OF OTHER ORGANISM INVOLVED IN SYMBIOTIC INTERACTION                              | 13 | 1.57 | 0.03 | 0.24 |
| NEGATIVE REGULATION OF MAPK CASCADE                                                              | 64 | 1.57 | 0.00 | 0.25 |
| POSITIVE REGULATION OF NUCLEAR-TRANSCRIBED MRNA CATABOLIC PROCESS, DEADENYLATION-DEPENDENT DECAY | 7  | 1.57 | 0.02 | 0.24 |
| REGULATION OF ACETYL-COA BIOSYNTHETIC PROCESS FROM PYRUVATE                                      | 11 | 1.57 | 0.01 | 0.24 |
| INTEGRIN-MEDIATED SIGNALING PATHWAY                                                              | 22 | 1.57 | 0.01 | 0.24 |
| POSTTRANSCRIPTIONAL GENE SILENCING                                                               | 24 | 1.57 | 0.02 | 0.24 |
| B CELL ACTIVATION                                                                                | 82 | 1.57 | 0.00 | 0.24 |
| REGULATION OF MUSCLE CELL DIFFERENTIATION                                                        | 70 | 1.57 | 0.00 | 0.24 |
| CEREBRAL CORTEX DEVELOPMENT                                                                      | 64 | 1.57 | 0.01 | 0.24 |
| POSITIVE REGULATION OF EPITHELIAL CELL DIFFERENTIATION                                           | 12 | 1.57 | 0.03 | 0.24 |
| CAMERA-TYPE EYE PHOTORECEPTOR CELL DIFFERENTIATION                                               | 14 | 1.57 | 0.02 | 0.24 |
| NEGATIVE REGULATION OF TRANSLATION, NCRNA-MEDIATED                                               | 8  | 1.57 | 0.02 | 0.24 |
| POSITIVE REGULATION OF NUCLEASE ACTIVITY                                                         | 65 | 1.57 | 0.00 | 0.24 |
| REGULATION OF MUSCLE ADAPTATION                                                                  | 18 | 1.57 | 0.02 | 0.24 |
| POSTTRANSCRIPTIONAL GENE SILENCING BY RNA                                                        | 24 | 1.57 | 0.01 | 0.24 |
| POSITIVE REGULATION OF PHOSPHATIDYLINOSITOL 3-KINASE ACTIVITY                                    | 18 | 1.56 | 0.02 | 0.24 |
| MOVEMENT IN ENVIRONMENT OF OTHER ORGANISM INVOLVED IN SYMBIOTIC INTERACTION                      | 13 | 1.56 | 0.02 | 0.24 |
| ENTRY INTO OTHER ORGANISM INVOLVED IN SYMBIOTIC INTERACTION                                      | 13 | 1.56 | 0.02 | 0.24 |

|                                                                                              |     |      |      |      |
|----------------------------------------------------------------------------------------------|-----|------|------|------|
| NUCLEAR PORE COMPLEX ASSEMBLY                                                                | 7   | 1.56 | 0.02 | 0.24 |
| ESTABLISHMENT OF SPINDLE LOCALIZATION                                                        | 12  | 1.56 | 0.02 | 0.24 |
| SOMATIC CELL DNA RECOMBINATION                                                               | 31  | 1.56 | 0.01 | 0.24 |
| PRODUCTION OF MOLECULAR MEDIATOR OF IMMUNE RESPONSE                                          | 32  | 1.56 | 0.02 | 0.24 |
| CELLULAR RESPONSE TO ABIOTIC STIMULUS                                                        | 103 | 1.56 | 0.00 | 0.24 |
| REGULATION OF RESPONSE TO CYTOKINE STIMULUS                                                  | 69  | 1.56 | 0.00 | 0.23 |
| TYPE B PANCREATIC CELL DIFFERENTIATION                                                       | 12  | 1.56 | 0.02 | 0.24 |
| REGULATION OF TRANSLATION, NCRNA-MEDIATED                                                    | 8   | 1.56 | 0.02 | 0.24 |
| NEGATIVE REGULATION OF MITOTIC METAPHASE/ANAPHASE TRANSITION                                 | 28  | 1.56 | 0.01 | 0.24 |
| ENTRY INTO HOST SIGNAL TRANSDUCTION INVOLVED IN CELL CYCLE CHECKPOINT                        | 13  | 1.56 | 0.02 | 0.24 |
| SPINDLE LOCALIZATION                                                                         | 65  | 1.56 | 0.01 | 0.24 |
| SPINDLE CHECKPOINT                                                                           | 12  | 1.56 | 0.01 | 0.24 |
| PROTEIN IMPORT                                                                               | 31  | 1.56 | 0.01 | 0.24 |
| NEGATIVE REGULATION OF ENDOTHELIAL CELL PROLIFERATION                                        | 70  | 1.56 | 0.01 | 0.23 |
| PROTEIN LOCALIZATION TO NUCLEUS                                                              | 19  | 1.56 | 0.02 | 0.23 |
| REGULATION OF INTERPHASE OF MITOTIC CELL CYCLE                                               | 69  | 1.56 | 0.00 | 0.23 |
| DNA DAMAGE CHECKPOINT                                                                        | 98  | 1.56 | 0.00 | 0.23 |
| MITOCHONDRION ORGANIZATION                                                                   | 106 | 1.56 | 0.00 | 0.24 |
| REGULATION OF BINDING ORGANELLE ASSEMBLY                                                     | 117 | 1.56 | 0.00 | 0.24 |
| SOMATIC DIVERSIFICATION OF IMMUNE RECEPTORS VIA GERMLINE RECOMBINATION WITHIN A SINGLE LOCUS | 104 | 1.55 | 0.00 | 0.24 |
| PROTEIN UBIQUITINATION INVOLVED IN UBIQUITIN-DEPENDENT PROTEIN CATABOLIC PROCESS             | 52  | 1.55 | 0.00 | 0.24 |
| NEGATIVE REGULATION OF NEUROGENESIS                                                          | 31  | 1.55 | 0.02 | 0.23 |
| SPINDLE ASSEMBLY CHECKPOINT                                                                  | 21  | 1.55 | 0.02 | 0.23 |
|                                                                                              | 79  | 1.55 | 0.01 | 0.24 |
|                                                                                              | 27  | 1.55 | 0.01 | 0.24 |

|                                                                              |     |      |      |      |
|------------------------------------------------------------------------------|-----|------|------|------|
| NEGATIVE REGULATION OF<br>INTRACELLULAR PROTEIN KINASE<br>CASCADE            | 96  | 1.55 | 0.00 | 0.24 |
| VESICLE LOCALIZATION                                                         | 56  | 1.55 | 0.01 | 0.24 |
| PROTEIN SUMOYLATION                                                          | 17  | 1.55 | 0.01 | 0.24 |
| SIGNAL TRANSDUCTION<br>INVOLVED IN DNA INTEGRITY<br>CHECKPOINT               | 64  | 1.55 | 0.01 | 0.24 |
| REGULATION OF INTRACELLULAR<br>ESTROGEN RECEPTOR SIGNALING<br>PATHWAY        | 15  | 1.55 | 0.02 | 0.24 |
| SIGNAL TRANSDUCTION<br>INVOLVED IN MITOTIC CELL CYCLE<br>CHECKPOINT          | 63  | 1.55 | 0.01 | 0.24 |
| DNA INTEGRITY CHECKPOINT                                                     | 108 | 1.55 | 0.00 | 0.24 |
| NEGATIVE REGULATION OF<br>TRANSLATION INVOLVED IN GENE<br>SILENCING BY MIRNA | 8   | 1.55 | 0.03 | 0.24 |
| CHROMOSOME SEGREGATION                                                       | 72  | 1.55 | 0.01 | 0.24 |
| SIGNAL TRANSDUCTION<br>INVOLVED IN DNA DAMAGE<br>CHECKPOINT                  | 64  | 1.55 | 0.01 | 0.24 |
| HEMATOPOIETIC PROGENITOR<br>CELL DIFFERENTIATION                             | 29  | 1.55 | 0.01 | 0.24 |
| SMOOTH MUSCLE CONTRACTION                                                    | 24  | 1.55 | 0.01 | 0.24 |
| PLATELET-DERIVED GROWTH<br>FACTOR RECEPTOR SIGNALING<br>PATHWAY              | 12  | 1.55 | 0.02 | 0.24 |
| TRANSEPITHELIAL TRANSPORT                                                    | 9   | 1.54 | 0.02 | 0.24 |
| CEREBRAL CORTEX GABAERGIC<br>INTERNEURON DIFFERENTIATION                     | 9   | 1.54 | 0.02 | 0.24 |
| CENTRAL NERVOUS SYSTEM<br>PROJECTION NEURON<br>AXONOGENESIS                  | 18  | 1.54 | 0.03 | 0.24 |
| REGULATION OF AXON<br>EXTENSION INVOLVED IN AXON<br>GUIDANCE                 | 8   | 1.54 | 0.02 | 0.24 |
| NEGATIVE REGULATION OF<br>MICROTUBULE POLYMERIZATION<br>OR DEPOLYMERIZATION  | 15  | 1.54 | 0.02 | 0.24 |
| REGULATION OF NITRIC-OXIDE<br>SYNTHASE BIOSYNTHETIC<br>PROCESS               | 9   | 1.54 | 0.02 | 0.24 |
| DEVELOPMENT OF SECONDARY<br>SEXUAL CHARACTERISTICS                           | 10  | 1.54 | 0.01 | 0.24 |
| PROTEIN ACETYLATION                                                          | 66  | 1.54 | 0.01 | 0.24 |
| POSITIVE REGULATION OF B CELL<br>PROLIFERATION                               | 19  | 1.54 | 0.02 | 0.24 |
| CILIUM ORGANIZATION                                                          | 64  | 1.54 | 0.00 | 0.24 |

|                                                                                               |     |      |      |      |
|-----------------------------------------------------------------------------------------------|-----|------|------|------|
| B CELL RECEPTOR SIGNALING PATHWAY                                                             | 19  | 1.54 | 0.03 | 0.24 |
| VISUAL BEHAVIOR                                                                               | 12  | 1.54 | 0.02 | 0.24 |
| VESICLE TARGETING                                                                             | 30  | 1.54 | 0.02 | 0.24 |
| CELLULAR RESPONSE TO FLUID SHEAR STRESS                                                       | 8   | 1.54 | 0.02 | 0.24 |
| REGULATION OF PROTEASOMAL UBIQUITIN-DEPENDENT PROTEIN CATABOLIC PROCESS                       | 47  | 1.54 | 0.01 | 0.24 |
| SIGNAL TRANSDUCTION INVOLVED IN MITOTIC G1 DNA DAMAGE CHECKPOINT                              | 63  | 1.54 | 0.01 | 0.24 |
| POSITIVE REGULATION OF TUMOR NECROSIS FACTOR BIOSYNTHETIC PROCESS                             | 8   | 1.54 | 0.02 | 0.24 |
| CENTROSOME ORGANIZATION                                                                       | 35  | 1.54 | 0.01 | 0.24 |
| NEGATIVE REGULATION OF VIRAL TRANSCRIPTION                                                    | 13  | 1.54 | 0.03 | 0.24 |
| REGULATION OF TUMOR NECROSIS FACTOR BIOSYNTHETIC PROCESS                                      | 11  | 1.53 | 0.02 | 0.25 |
| CYTOSKELETON-DEPENDENT INTRACELLULAR TRANSPORT                                                | 45  | 1.53 | 0.01 | 0.24 |
| PROSTATE GLAND DEVELOPMENT                                                                    | 39  | 1.53 | 0.01 | 0.25 |
| MITOTIC DNA DAMAGE CHECKPOINT                                                                 | 71  | 1.53 | 0.01 | 0.24 |
| SPLICEOSOMAL COMPLEX ASSEMBLY                                                                 | 15  | 1.53 | 0.02 | 0.25 |
| DNA DAMAGE RESPONSE, SIGNAL TRANSDUCTION BY P53 CLASS MEDIATOR RESULTING IN CELL CYCLE ARREST | 63  | 1.53 | 0.01 | 0.25 |
| CELLULAR RESPONSE TO RADIATION                                                                | 48  | 1.53 | 0.01 | 0.25 |
| MITOTIC CELL CYCLE CHECKPOINT                                                                 | 116 | 1.53 | 0.00 | 0.24 |
| CILIUM ASSEMBLY                                                                               | 64  | 1.53 | 0.01 | 0.24 |
| PROTEIN EXPORT FROM NUCLEUS                                                                   | 15  | 1.53 | 0.03 | 0.24 |
| HIPPOCAMPUS DEVELOPMENT                                                                       | 44  | 1.53 | 0.01 | 0.24 |
| VIRAL GENOME REPLICATION                                                                      | 9   | 1.53 | 0.02 | 0.24 |
| MITOTIC SPINDLE ASSEMBLY CHECKPOINT                                                           | 26  | 1.53 | 0.02 | 0.24 |
| DENDRITE DEVELOPMENT                                                                          | 67  | 1.53 | 0.01 | 0.24 |
| REGULATION OF DENDRITIC SPINE DEVELOPMENT                                                     | 18  | 1.53 | 0.02 | 0.24 |
| SPHINGOLIPID METABOLIC PROCESS                                                                | 74  | 1.53 | 0.01 | 0.24 |
| MITOTIC SPINDLE CHECKPOINT                                                                    | 29  | 1.53 | 0.01 | 0.24 |

|                                                          |    |      |      |      |
|----------------------------------------------------------|----|------|------|------|
| SOMATIC RECOMBINATION OF IMMUNOGLOBULIN GENE SEGMENTS    | 23 | 1.53 | 0.03 | 0.25 |
| REGULATION OF FATTY ACID OXIDATION                       | 29 | 1.53 | 0.02 | 0.24 |
| INOSITOL LIPID-MEDIATED SIGNALING                        | 52 | 1.53 | 0.01 | 0.24 |
| MICROTUBULE-BASED TRANSPORT                              | 43 | 1.53 | 0.02 | 0.24 |
| NEGATIVE REGULATION OF GENE EXPRESSION, EPIGENETIC       | 16 | 1.53 | 0.02 | 0.24 |
| NOTCH SIGNALING PATHWAY                                  | 77 | 1.53 | 0.00 | 0.25 |
| EMBRYONIC HEMOPOIESIS                                    | 23 | 1.52 | 0.02 | 0.25 |
| SUBSTRATE ADHESION-DEPENDENT CELL SPREADING              | 22 | 1.52 | 0.03 | 0.25 |
| REGULATION OF T CELL CHEMOTAXIS                          | 8  | 1.52 | 0.02 | 0.25 |
| REGULATION OF TRANSLATIONAL INITIATION                   | 32 | 1.52 | 0.02 | 0.25 |
| POSITIVE REGULATION OF MRNA 3'-END PROCESSING            | 12 | 1.52 | 0.02 | 0.25 |
| REGULATION OF GLUCOSE TRANSPORT                          | 57 | 1.52 | 0.01 | 0.25 |
| DOUBLE-STRAND BREAK REPAIR VIA NONHOMOLOGOUS END JOINING | 11 | 1.52 | 0.01 | 0.25 |
| PEPTIDYL-THREONINE PHOSPHORYLATION                       | 24 | 1.52 | 0.02 | 0.25 |
| PHOSPHATIDYLINOSITOL-MEDIATED SIGNALING                  | 52 | 1.52 | 0.01 | 0.25 |
| PROTEIN K63-LINKED DEUBIQUITINATION                      | 15 | 1.52 | 0.02 | 0.25 |
| PROTEIN K48-LINKED UBIQUITINATION                        | 34 | 1.52 | 0.01 | 0.25 |
| SOMATIC HYPERMUTATION OF IMMUNOGLOBULIN GENES            | 7  | 1.52 | 0.03 | 0.25 |
| REGULATION OF MESENCHYMAL CELL PROLIFERATION             | 15 | 1.52 | 0.04 | 0.25 |
| POSITIVE REGULATION OF WNT RECEPTOR SIGNALING PATHWAY    | 44 | 1.52 | 0.01 | 0.25 |
| NEGATIVE REGULATION OF MITOSIS                           | 32 | 1.52 | 0.02 | 0.25 |
| REGULATION OF FOCAL ADHESION ASSEMBLY                    | 20 | 1.52 | 0.03 | 0.25 |
| NCRNA PROCESSING                                         | 71 | 1.52 | 0.01 | 0.25 |
| RESPONSE TO X-RAY                                        | 7  | 1.52 | 0.02 | 0.25 |
| NEGATIVE REGULATION OF DNA METABOLIC PROCESS             | 46 | 1.52 | 0.01 | 0.25 |

|                                                                           |    |       |      |      |
|---------------------------------------------------------------------------|----|-------|------|------|
| SOMATIC RECOMBINATION OF IMMUNOGLOBULIN GENES INVOLVED IN IMMUNE RESPONSE | 18 | 1.52  | 0.02 | 0.25 |
| POSITIVE REGULATION OF T CELL CHEMOTAXIS                                  | 8  | 1.51  | 0.02 | 0.25 |
| PHOSPHOLIPID TRANSPORT                                                    | 24 | 1.51  | 0.03 | 0.25 |
| NEGATIVE REGULATION OF TRANSCRIPTION BY COMPETITIVE PROMOTER BINDING      | 9  | 1.51  | 0.01 | 0.25 |
| SOMATIC DIVERSIFICATION OF IMMUNE RECEPTORS                               | 33 | 1.51  | 0.02 | 0.25 |
| REGULATION OF DENDRITE MORPHOGENESIS                                      | 31 | 1.51  | 0.02 | 0.25 |
| CELLULAR RESPONSE TO BMP STIMULUS                                         | 9  | 1.51  | 0.04 | 0.25 |
| SUPEROXIDE METABOLIC PROCESS                                              | 18 | 1.51  | 0.03 | 0.25 |
| FOREBRAIN MORPHOGENESIS                                                   | 14 | 1.51  | 0.03 | 0.25 |
| REGULATION OF VASCULAR ENDOTHELIAL GROWTH FACTOR PRODUCTION               | 18 | 1.51  | 0.02 | 0.25 |
| NEGATIVE REGULATION OF MUSCLE TISSUE DEVELOPMENT                          | 8  | -2.06 | 0.01 | 0.19 |
| NEGATIVE REGULATION OF MUSCLE ORGAN DEVELOPMENT                           | 8  | -2.03 | 0.01 | 0.18 |
| GLUCOCORTICOID METABOLIC PROCESS                                          | 10 | -2.02 | 0.01 | 0.17 |

---

*GSEA/DFLAT*, Gene Set Enrichment Analysis with Developmental Functional Annotation at Tufts

<sup>a</sup> Nominal or raw p-value

<sup>b</sup> False discovery rate q-value
